# Supplementary material
Source: PubMed Central journal article supplement (PMC7611011)

SUPPLEMENTARY DATA

Supplementary Table 1. Strength of association of genetic instruments with measured exposure exposures.

| Trait                             | % variance    | F-statistic   | P         |
|-----------------------------------|---------------|---------------|-----------|
| Diastolic BP                      | 2.17          | 9962          | < 1.0E-15 |
| Systolic BP                       | 1.74          | 7966          | < 1.0E-15 |
| HDL cholesterol                   | 6.4           | 26895         | < 1.0E-15 |
| LDL cholesterol                   | 4.36          | 19550         | < 1.0E-15 |
| Triglycerides                     | 4.91          | 22189         | < 1.0E-15 |
| BMI                               | 1.6           | 7295          | < 1.0E-15 |
| Favourable adiposity              | 0.1           | 468           | < 1.0E-15 |
| Waist hip ratio (adjusted by BMI) | 1.5           | 6837          | < 1.0E-15 |
| Fasting glucose                   | Not available | Not available |           |
| Fasting insulin                   | Not available | Not available |           |
| T2D                               | 0.6           | 2504          | < 1.0E-15 |

## SUPPLEMENTARY DATA

Supplementary Table2. Genetic variants utilised in Mendelian randomization analyses. Gene location as reported by the original study (where available).

| Trait           | Genetic variant | Trait raising allele | Trait lowering allele | Beta from the primary GWAS* | Primary GWAS* reference | Gene Location |
|-----------------|-----------------|----------------------|-----------------------|-----------------------------|-------------------------|---------------|
| BODY MASS INDEX | rs1000940       | G                    | A                     | 0.019                       | Locke et al., 2014      | RABEP1        |
| BODY MASS INDEX | rs10132280      | C                    | A                     | 0.023                       | Locke et al., 2014      | STXBP6        |
| BODY MASS INDEX | rs1016287       | T                    | C                     | 0.023                       | Locke et al., 2014      | FLJ30838      |
| BODY MASS INDEX | rs10182181      | G                    | A                     | 0.031                       | Locke et al., 2014      | ADCY3         |
| BODY MASS INDEX | rs10733682      | A                    | G                     | 0.017                       | Locke et al., 2014      | LMX1B         |
| BODY MASS INDEX | rs10938397      | G                    | A                     | 0.04                        | Locke et al., 2014      | GNPDA2        |
| BODY MASS INDEX | rs10968576      | G                    | A                     | 0.025                       | Locke et al., 2014      | LINGO2        |
| BODY MASS INDEX | rs11057405      | G                    | A                     | 0.031                       | Locke et al., 2014      | CLIP1         |
| BODY MASS INDEX | rs11126666      | A                    | G                     | 0.021                       | Locke et al., 2014      | KCNK3         |
| BODY MASS INDEX | rs11165643      | T                    | C                     | 0.022                       | Locke et al., 2014      | PTBP2         |
| BODY MASS INDEX | rs11191560      | C                    | T                     | 0.031                       | Locke et al., 2014      | NT5C2         |
| BODY MASS INDEX | rs11583200      | C                    | T                     | 0.018                       | Locke et al., 2014      | ELAVL4        |
| BODY MASS INDEX | rs1167827       | G                    | A                     | 0.02                        | Locke et al., 2014      | HIP1          |
| BODY MASS INDEX | rs11688816      | G                    | A                     | 0.017                       | Locke et al., 2014      | EHBP1         |
| BODY MASS INDEX | rs11727676      | T                    | C                     | 0.036                       | Locke et al., 2014      | HHIP          |
| BODY MASS INDEX | rs11847697      | T                    | C                     | 0.049                       | Locke et al., 2014      | PRKD1         |
| BODY MASS INDEX | rs12286929      | G                    | A                     | 0.022                       | Locke et al., 2014      | CADM1         |
| BODY MASS INDEX | rs12401738      | A                    | G                     | 0.021                       | Locke et al., 2014      | FUBP1         |
| BODY MASS INDEX | rs12429545      | A                    | G                     | 0.033                       | Locke et al., 2014      | OLFM4         |
| BODY MASS INDEX | rs12446632      | G                    | A                     | 0.04                        | Locke et al., 2014      | GPRC5B        |
| BODY MASS INDEX | rs12566985      | G                    | A                     | 0.024                       | Locke et al., 2014      | FPGT-TNNI3K   |
| BODY MASS INDEX | rs12885454      | C                    | A                     | 0.021                       | Locke et al., 2014      | PRKD1         |
| BODY MASS INDEX | rs12940622      | G                    | A                     | 0.018                       | Locke et al., 2014      | RPTOR         |
| BODY MASS INDEX | rs13021737      | G                    | A                     | 0.06                        | Locke et al., 2014      | TMEM18        |
| BODY MASS INDEX | rs13078960      | G                    | T                     | 0.03                        | Locke et al., 2014      | CADM2         |
| BODY MASS INDEX | rs13191362      | A                    | G                     | 0.028                       | Locke et al., 2014      | PARK2         |
| BODY MASS INDEX | rs1516725       | C                    | T                     | 0.045                       | Locke et al., 2014      | ETV5          |
| BODY MASS INDEX | rs1528435       | T                    | C                     | 0.018                       | Locke et al., 2014      | UBE2E3        |
| BODY MASS INDEX | rs1558902       | A                    | T                     | 0.082                       | Locke et al., 2014      | FTO           |
| BODY MASS INDEX | rs16851483      | T                    | G                     | 0.048                       | Locke et al., 2014      | RASA2         |
| BODY MASS INDEX | rs16951275      | T                    | C                     | 0.031                       | Locke et al., 2014      | MAP2K5        |
| BODY MASS INDEX | rs17001654      | G                    | C                     | 0.031                       | Locke et al., 2014      | SCARB2        |
| BODY MASS INDEX | rs17024393      | C                    | T                     | 0.066                       | Locke et al., 2014      | GNAT2         |
| BODY MASS INDEX | rs17094222      | C                    | T                     | 0.025                       | Locke et al., 2014      | HIF1AN        |

## SUPPLEMENTARY DATA

|                          |            |   |   |       |                    |               |
|--------------------------|------------|---|---|-------|--------------------|---------------|
| BODY MASS INDEX          | rs17405819 | T | C | 0.022 | Locke et al., 2014 | HNF4G         |
| BODY MASS INDEX          | rs17724992 | A | G | 0.019 | Locke et al., 2014 | PGPEP1        |
| BODY MASS INDEX          | rs1808579  | C | T | 0.017 | Locke et al., 2014 | C18orf8       |
| BODY MASS INDEX          | rs1928295  | T | C | 0.019 | Locke et al., 2014 | TLR4          |
| BODY MASS INDEX          | rs2033529  | G | A | 0.019 | Locke et al., 2014 | TDRG1         |
| BODY MASS INDEX          | rs2033732  | C | T | 0.019 | Locke et al., 2014 | RALYL         |
| BODY MASS INDEX          | rs205262   | G | A | 0.022 | Locke et al., 2014 | C6orf106      |
| BODY MASS INDEX          | rs2075650  | A | G | 0.026 | Locke et al., 2014 | TOMM40        |
| BODY MASS INDEX          | rs2112347  | T | G | 0.026 | Locke et al., 2014 | POC5          |
| BODY MASS INDEX          | rs2121279  | T | C | 0.025 | Locke et al., 2014 | LRP1B         |
| BODY MASS INDEX          | rs2176598  | T | C | 0.02  | Locke et al., 2014 | HSD17B12      |
| BODY MASS INDEX          | rs2207139  | G | A | 0.045 | Locke et al., 2014 | TFAP2B        |
| BODY MASS INDEX          | rs2245368  | C | T | 0.032 | Locke et al., 2014 | PMS2L11       |
| BODY MASS INDEX          | rs2287019  | C | T | 0.036 | Locke et al., 2014 | QPCTL         |
| BODY MASS INDEX          | rs2365389  | C | T | 0.02  | Locke et al., 2014 | FHIT          |
| BODY MASS INDEX          | rs2650492  | A | G | 0.021 | Locke et al., 2014 | SBK1          |
| BODY MASS INDEX          | rs2820292  | C | A | 0.02  | Locke et al., 2014 | NAV1          |
| BODY MASS INDEX          | rs29941    | G | A | 0.018 | Locke et al., 2014 | KCTD15        |
| BODY MASS INDEX          | rs3101336  | C | T | 0.033 | Locke et al., 2014 | NEGR1         |
| BODY MASS INDEX          | rs3736485  | A | G | 0.018 | Locke et al., 2014 | DMXL2         |
| BODY MASS INDEX          | rs3810291  | A | G | 0.028 | Locke et al., 2014 | ZC3H4         |
| BODY MASS INDEX          | rs3817334  | T | C | 0.026 | Locke et al., 2014 | MTCH2         |
| BODY MASS INDEX          | rs3849570  | A | C | 0.019 | Locke et al., 2014 | GBE1          |
| BODY MASS INDEX          | rs4256980  | G | C | 0.021 | Locke et al., 2014 | TRIM66        |
| BODY MASS INDEX          | rs4740619  | T | C | 0.018 | Locke et al., 2014 | C9orf93       |
| BODY MASS INDEX          | rs543874   | G | A | 0.048 | Locke et al., 2014 | SEC16B        |
| BODY MASS INDEX          | rs6477694  | C | T | 0.017 | Locke et al., 2014 | EPB41L4B      |
| BODY MASS INDEX          | rs6567160  | C | T | 0.056 | Locke et al., 2014 | MC4R          |
| BODY MASS INDEX          | rs657452   | A | G | 0.023 | Locke et al., 2014 | AGBL4         |
| BODY MASS INDEX          | rs6804842  | G | A | 0.019 | Locke et al., 2014 | RARB          |
| BODY MASS INDEX          | rs7138803  | A | G | 0.032 | Locke et al., 2014 | BCDIN3D       |
| BODY MASS INDEX          | rs7141420  | T | C | 0.024 | Locke et al., 2014 | NRXN3         |
| BODY MASS INDEX          | rs7243357  | T | G | 0.022 | Locke et al., 2014 | GRP           |
| BODY MASS INDEX          | rs758747   | T | C | 0.023 | Locke et al., 2014 | NLRC3         |
| BODY MASS INDEX          | rs7599312  | G | A | 0.022 | Locke et al., 2014 | ERBB4         |
| BODY MASS INDEX          | rs7899106  | G | A | 0.04  | Locke et al., 2014 | GRID1         |
| BODY MASS INDEX          | rs9400239  | C | T | 0.019 | Locke et al., 2014 | FOXO3         |
| BODY MASS INDEX          | rs9581854  | T | C | 0.03  | Locke et al., 2014 | MTIF3         |
| BODY MASS INDEX          | rs9925964  | A | G | 0.019 | Locke et al., 2014 | KAT8          |
| DIASTOLIC BLOOD PRESSURE | rs10850411 | T | C | 0.253 | Ehret et al. 2011  | TBX3          |
| DIASTOLIC BLOOD PRESSURE | rs1173771  | G | A | 0.261 | Ehret et al. 2011  | C5orf23, NPR3 |

## SUPPLEMENTARY DATA

|                          |            |   |   |       |                   |                     |
|--------------------------|------------|---|---|-------|-------------------|---------------------|
| DIASTOLIC BLOOD PRESSURE | rs13082711 | C | T | 0.238 | Ehret et al. 2011 | SLC4A7              |
| DIASTOLIC BLOOD PRESSURE | rs13139571 | C | A | 0.26  | Ehret et al. 2011 | GUCY1A3, GUCY1B3    |
| DIASTOLIC BLOOD PRESSURE | rs1813353  | T | C | 0.415 | Ehret et al. 2011 | CACNB2              |
| DIASTOLIC BLOOD PRESSURE | rs381815   | T | C | 0.348 | Ehret et al. 2011 | PLEKHA7             |
| DIASTOLIC BLOOD PRESSURE | rs419076   | T | C | 0.241 | Ehret et al. 2011 | MECOM               |
| DIASTOLIC BLOOD PRESSURE | rs4373814  | C | G | 0.218 | Ehret et al. 2011 | CACNB2              |
| DIASTOLIC BLOOD PRESSURE | rs4590817  | G | C | 0.419 | Ehret et al. 2011 | C10orf107           |
| DIASTOLIC BLOOD PRESSURE | rs6015450  | G | A | 0.557 | Ehret et al. 2011 | EDN3, GNAS          |
| DIASTOLIC BLOOD PRESSURE | rs10077885 | C | A | 0.174 | Ehret et al. 2016 | TRIM36              |
| DIASTOLIC BLOOD PRESSURE | rs11128722 | G | A | 0.173 | Ehret et al. 2016 | FGD5                |
| DIASTOLIC BLOOD PRESSURE | rs11556924 | C | T | 0.214 | Ehret et al. 2016 | ZC3HC1              |
| DIASTOLIC BLOOD PRESSURE | rs11953630 | C | T | 0.281 | Ehret et al. 2016 | EBF1                |
| DIASTOLIC BLOOD PRESSURE | rs12627651 | A | G | 0.204 | Ehret et al. 2016 | CRYAA, SIK1         |
| DIASTOLIC BLOOD PRESSURE | rs12940887 | T | C | 0.27  | Ehret et al. 2016 | ZNF652              |
| DIASTOLIC BLOOD PRESSURE | rs12958173 | A | C | 0.179 | Ehret et al. 2016 | SETBP1              |
| DIASTOLIC BLOOD PRESSURE | rs13107325 | C | T | 0.684 | Ehret et al. 2016 | SLC39A8             |
| DIASTOLIC BLOOD PRESSURE | rs1327235  | G | A | 0.308 | Ehret et al. 2016 | JAG1                |
| DIASTOLIC BLOOD PRESSURE | rs1361831  | C | T | 0.271 | Ehret et al. 2016 | RSPO3               |
| DIASTOLIC BLOOD PRESSURE | rs1371182  | C | T | 0.252 | Ehret et al. 2016 | FIGN, GRB14         |
| DIASTOLIC BLOOD PRESSURE | rs1450271  | T | C | 0.199 | Ehret et al. 2016 | ADM                 |
| DIASTOLIC BLOOD PRESSURE | rs1458038  | T | C | 0.457 | Ehret et al. 2016 | FGF5                |
| DIASTOLIC BLOOD PRESSURE | rs1620668  | G | A | 0.285 | Ehret et al. 2016 | ST7L, CAPZA1, MOV10 |
| DIASTOLIC BLOOD PRESSURE | rs17080093 | C | T | 0.411 | Ehret et al. 2016 | PLEKHG1             |
| DIASTOLIC BLOOD PRESSURE | rs17638167 | C | T | 0.348 | Ehret et al. 2016 | ELAVL3              |
| DIASTOLIC BLOOD PRESSURE | rs1799945  | G | C | 0.457 | Ehret et al. 2016 | HFE                 |
| DIASTOLIC BLOOD PRESSURE | rs1975487  | G | A | 0.16  | Ehret et al. 2016 | PNPT1               |
| DIASTOLIC BLOOD PRESSURE | rs2187668  | C | T | 0.372 | Ehret et al. 2016 | BAT2, BAT5          |
| DIASTOLIC BLOOD PRESSURE | rs2291435  | C | T | 0.156 | Ehret et al. 2016 | TBC1D1, FLJ13197    |
| DIASTOLIC BLOOD PRESSURE | rs2493134  | C | T | 0.275 | Ehret et al. 2016 | AGT                 |
| DIASTOLIC BLOOD PRESSURE | rs2521501  | T | A | 0.359 | Ehret et al. 2016 | FURIN, FES          |
| DIASTOLIC BLOOD PRESSURE | rs2586886  | C | T | 0.254 | Ehret et al. 2016 | KCNK3               |
| DIASTOLIC BLOOD PRESSURE | rs2891546  | G | A | 0.38  | Ehret et al. 2016 | TBX5, TBX3          |
| DIASTOLIC BLOOD PRESSURE | rs2969070  | G | A | 0.182 | Ehret et al. 2016 | CHST12, LFNG        |
| DIASTOLIC BLOOD PRESSURE | rs3184504  | T | C | 0.448 | Ehret et al. 2016 | SH2B3               |
| DIASTOLIC BLOOD PRESSURE | rs3735533  | C | T | 0.445 | Ehret et al. 2016 | HOTTIP, EVX         |
| DIASTOLIC BLOOD PRESSURE | rs3752728  | A | G | 0.319 | Ehret et al. 2016 | PDE3A               |
| DIASTOLIC BLOOD PRESSURE | rs4245739  | A | C | 0.243 | Ehret et al. 2016 | MDM4                |
| DIASTOLIC BLOOD PRESSURE | rs4247374  | C | T | 0.385 | Ehret et al. 2016 | INSR                |
| DIASTOLIC BLOOD PRESSURE | rs592373   | A | G | 0.282 | Ehret et al. 2016 | LSP1, TNNT3         |
| DIASTOLIC BLOOD PRESSURE | rs6271     | C | T | 0.465 | Ehret et al. 2016 | DBH                 |
| DIASTOLIC BLOOD PRESSURE | rs633185   | C | G | 0.328 | Ehret et al. 2016 | FLJ32810, TMEM133   |

## SUPPLEMENTARY DATA

|                          |             |   |   |       |                    |                          |
|--------------------------|-------------|---|---|-------|--------------------|--------------------------|
| DIASTOLIC BLOOD PRESSURE | rs6442101   | T | C | 0.303 | Ehret et al. 2016  | MAP4                     |
| DIASTOLIC BLOOD PRESSURE | rs6891344   | A | G | 0.231 | Ehret et al. 2016  | CSNK1G3<br>RAPSN, PSMC3, |
| DIASTOLIC BLOOD PRESSURE | rs7103648   | G | A | 0.241 | Ehret et al. 2016  | SLC39A13                 |
| DIASTOLIC BLOOD PRESSURE | rs740746    | A | G | 0.32  | Ehret et al. 2016  | ADRB1                    |
| DIASTOLIC BLOOD PRESSURE | rs751984    | T | C | 0.376 | Ehret et al. 2016  | LRRC10B                  |
| DIASTOLIC BLOOD PRESSURE | rs772178    | G | A | 0.208 | Ehret et al. 2016  | NCAPH                    |
| DIASTOLIC BLOOD PRESSURE | rs880315    | C | T | 0.257 | Ehret et al. 2016  | CASZ1                    |
| DIASTOLIC BLOOD PRESSURE | rs918466    | G | A | 0.182 | Ehret et al. 2016  | ADAMTS9                  |
| DIASTOLIC BLOOD PRESSURE | rs932764    | G | A | 0.224 | Ehret et al. 2016  | PLCE1                    |
| DIASTOLIC BLOOD PRESSURE | rs943037    | C | T | 0.482 | Ehret et al. 2016  | CYP17A1, NT5C2           |
| DIASTOLIC BLOOD PRESSURE | rs1060105   | C | T | 0.182 | Surendram et al.   | SBNO1                    |
| DIASTOLIC BLOOD PRESSURE | rs10995311  | C | G | 0.21  | Surendram et al.   | ADO                      |
| DIASTOLIC BLOOD PRESSURE | rs110419    | A | G | 0.159 | Surendram et al.   | LMO1                     |
| DIASTOLIC BLOOD PRESSURE | rs1126464   | C | G | 0.275 | Surendram et al.   | DPEP1                    |
| DIASTOLIC BLOOD PRESSURE | rs12521868  | G | T | 0.191 | Surendram et al.   | C5orf56                  |
| DIASTOLIC BLOOD PRESSURE | rs1378942   | C | A | 0.416 | Surendram et al.   | CYP1A1-ULK3              |
| DIASTOLIC BLOOD PRESSURE | rs16851397  | G | A | 0.375 | Surendram et al.   | ZBTB38                   |
| DIASTOLIC BLOOD PRESSURE | rs17249754  | G | A | 0.522 | Surendram et al.   | ATP2B1                   |
| DIASTOLIC BLOOD PRESSURE | rs17367504  | A | G | 0.547 | Surendram et al.   | MTHFR, NPPB              |
| DIASTOLIC BLOOD PRESSURE | rs2304130   | G | A | 0.292 | Surendram et al.   | ZNF101                   |
| DIASTOLIC BLOOD PRESSURE | rs2972146   | T | G | 0.172 | Surendram et al.   | Intergenic               |
| DIASTOLIC BLOOD PRESSURE | rs3774372   | C | T | 0.367 | Surendram et al.   | ULK4                     |
| DIASTOLIC BLOOD PRESSURE | rs6095241   | G | A | 0.168 | Surendram et al.   | PREX1                    |
| DIASTOLIC BLOOD PRESSURE | rs687621    | A | G | 0.188 | Surendram et al.   | ABO                      |
| DIASTOLIC BLOOD PRESSURE | rs7302981   | A | G | 0.249 | Surendram et al.   | CERS5                    |
| DIASTOLIC BLOOD PRESSURE | rs805303    | G | A | 0.228 | Surendram et al.   | BAT2, BAT5               |
| DIASTOLIC BLOOD PRESSURE | rs8068318   | T | C | 0.262 | Surendram et al.   | TBX2                     |
| DIASTOLIC BLOOD PRESSURE | rs867186    | A | G | 0.265 | Surendram et al.   | PROCR                    |
| DIASTOLIC BLOOD PRESSURE | rs10078021  | G | T | 0.164 | Warren et al. 2017 | POC5                     |
| DIASTOLIC BLOOD PRESSURE | rs1063281   | C | T | 0.2   | Warren et al. 2017 | TNS1                     |
| DIASTOLIC BLOOD PRESSURE | rs11030119  | G | A | 0.163 | Warren et al. 2017 | BDNF                     |
| DIASTOLIC BLOOD PRESSURE | rs12374077  | C | G | 0.163 | Warren et al. 2017 | SENP2                    |
| DIASTOLIC BLOOD PRESSURE | rs12405515  | G | T | 0.165 | Warren et al. 2017 | DNM3                     |
| DIASTOLIC BLOOD PRESSURE | rs12408022  | T | C | 0.198 | Warren et al. 2017 | GPATCH2                  |
| DIASTOLIC BLOOD PRESSURE | rs12906962  | C | T | 0.221 | Warren et al. 2017 | chr15mb95                |
| DIASTOLIC BLOOD PRESSURE | rs12921187  | G | T | 0.174 | Warren et al. 2017 | PPL                      |
| DIASTOLIC BLOOD PRESSURE | rs13205180  | T | C | 0.168 | Warren et al. 2017 | PKHD1                    |
| DIASTOLIC BLOOD PRESSURE | rs143112823 | G | A | 0.403 | Warren et al. 2017 | RP11- 439C8.2            |
| DIASTOLIC BLOOD PRESSURE | rs1438896   | T | C | 0.234 | Warren et al. 2017 | TEX41                    |
| DIASTOLIC BLOOD PRESSURE | rs2306374   | C | T | 0.184 | Warren et al. 2017 | SCAF4                    |

## SUPPLEMENTARY DATA

|                          |            |   |    |       |                    |                |
|--------------------------|------------|---|----|-------|--------------------|----------------|
| DIASTOLIC BLOOD PRESSURE | rs2760061  | A | T  | 0.23  | Warren et al. 2017 | WNT3A          |
| DIASTOLIC BLOOD PRESSURE | rs2978098  | A | C  | 0.165 | Warren et al. 2017 | SNX31          |
| DIASTOLIC BLOOD PRESSURE | rs36022378 | C | T  | 0.202 | Warren et al. 2017 | CAMKV, ACTBP13 |
| DIASTOLIC BLOOD PRESSURE | rs4308     | A | G  | 0.213 | Warren et al. 2017 | ACE            |
| DIASTOLIC BLOOD PRESSURE | rs4364717  | G | A  | 0.175 | Warren et al. 2017 | MTAP           |
| DIASTOLIC BLOOD PRESSURE | rs4952611  | C | T  | 0.157 | Warren et al. 2017 | SLC8A1         |
| DIASTOLIC BLOOD PRESSURE | rs55701159 | T | G  | 0.285 | Warren et al. 2017 | ADCY3          |
| DIASTOLIC BLOOD PRESSURE | rs6108168  | C | A  | 0.211 | Warren et al. 2017 | PLCB1          |
| DIASTOLIC BLOOD PRESSURE | rs62012628 | C | T  | 0.238 | Warren et al. 2017 | ADAMTS7        |
| DIASTOLIC BLOOD PRESSURE | rs62104477 | T | G  | 0.177 | Warren et al. 2017 | CCNE1          |
| DIASTOLIC BLOOD PRESSURE | rs62524579 | G | A  | 0.175 | Warren et al. 2017 | RP11-273G15.2  |
| DIASTOLIC BLOOD PRESSURE | rs6686889  | T | C  | 0.185 | Warren et al. 2017 | chr1mb25       |
| DIASTOLIC BLOOD PRESSURE | rs66887589 | C | T  | 0.215 | Warren et al. 2017 | PDE5A          |
| DIASTOLIC BLOOD PRESSURE | rs67330701 | C | T  | 0.367 | Warren et al. 2017 | MYEOV          |
| DIASTOLIC BLOOD PRESSURE | rs7178615  | G | A  | 0.179 | Warren et al. 2017 | RP11-321F6.1   |
| DIASTOLIC BLOOD PRESSURE | rs72799341 | A | G  | 0.185 | Warren et al. 2017 | FBXL19         |
| DIASTOLIC BLOOD PRESSURE | rs72812846 | T | A  | 0.209 | Warren et al. 2017 | CPEB4          |
| DIASTOLIC BLOOD PRESSURE | rs743757   | C | G  | 0.245 | Warren et al. 2017 | CACNA2D2       |
| DIASTOLIC BLOOD PRESSURE | rs745821   | T | G  | 0.189 | Warren et al. 2017 | MAPK4          |
| DIASTOLIC BLOOD PRESSURE | rs7592578  | G | T  | 0.24  | Warren et al. 2017 | TMEM194B       |
| DIASTOLIC BLOOD PRESSURE | rs76326501 | A | C  | 0.419 | Warren et al. 2017 | AC016735.1     |
| DIASTOLIC BLOOD PRESSURE | rs79146658 | C | NA | 0.311 | Warren et al. 2017 | CCDC141        |
| DIASTOLIC BLOOD PRESSURE | rs8059962  | C | T  | 0.17  | Warren et al. 2017 | CMIP           |
| DIASTOLIC BLOOD PRESSURE | rs9372498  | A | T  | 0.334 | Warren et al. 2017 | SLC35F1        |
| DIASTOLIC BLOOD PRESSURE | rs953492   | A | G  | 0.22  | Warren et al. 2017 | SDCCAG8        |
| DIASTOLIC BLOOD PRESSURE | rs9827472  | C | T  | 0.177 | Warren et al. 2017 | FAM208A        |
| FASTING GLUCOSE          | rs11715915 | C | T  | 0.012 | Scott et al. 2012  | AMT            |
| FASTING GLUCOSE          | rs7651090  | G | A  | 0.013 | Scott et al. 2012  | IGF2BP2        |
| FASTING GLUCOSE          | rs10747083 | A | G  | 0.013 | Scott et al. 2012  | P2RX2          |
| FASTING GLUCOSE          | rs340874   | C | T  | 0.013 | Scott et al. 2012  | PROX1          |
| FASTING GLUCOSE          | rs9368222  | A | C  | 0.014 | Scott et al. 2012  | CDKAL1         |
| FASTING GLUCOSE          | rs2302593  | C | G  | 0.014 | Scott et al. 2012  | GIPR           |
| FASTING GLUCOSE          | rs6943153  | T | C  | 0.015 | Scott et al. 2012  | GRB10          |
| FASTING GLUCOSE          | rs10814916 | C | A  | 0.016 | Scott et al. 2012  |                |
| FASTING GLUCOSE          | rs6072275  | A | G  | 0.016 | Scott et al. 2012  | TOP1           |
| FASTING GLUCOSE          | rs576674   | G | A  | 0.017 | Scott et al. 2012  | KL             |
| FASTING GLUCOSE          | rs3783347  | G | T  | 0.017 | Scott et al. 2012  | WARS           |
| FASTING GLUCOSE          | rs3829109  | G | A  | 0.017 | Scott et al. 2012  | DNLZ           |
| FASTING GLUCOSE          | rs4869272  | T | C  | 0.018 | Scott et al. 2012  | PCSK1          |
| FASTING GLUCOSE          | rs11603334 | G | A  | 0.019 | Scott et al. 2012  | ARAP1          |
| FASTING GLUCOSE          | rs11619319 | G | A  | 0.02  | Scott et al. 2012  | PDX1           |

## SUPPLEMENTARY DATA

|                      |            |   |   |       |                   |                  |
|----------------------|------------|---|---|-------|-------------------|------------------|
| FASTING GLUCOSE      | rs174576   | C | A | 0.02  | Scott et al. 2012 |                  |
| FASTING GLUCOSE      | rs11607883 | G | A | 0.021 | Scott et al. 2012 | CRY2             |
| FASTING GLUCOSE      | rs7903146  | T | C | 0.022 | Scott et al. 2012 | TCF7L2           |
| FASTING GLUCOSE      | rs4502156  | T | C | 0.022 | Scott et al. 2012 | VPS13C/C2CD4A/B  |
| FASTING GLUCOSE      | rs11708067 | A | G | 0.023 | Scott et al. 2012 | ADCY5            |
| FASTING GLUCOSE      | rs11039182 | T | C | 0.023 | Scott et al. 2012 | MADD             |
| FASTING GLUCOSE      | rs10811661 | T | C | 0.024 | Scott et al. 2012 | CDKN2B           |
| FASTING GLUCOSE      | rs983309   | T | G | 0.026 | Scott et al. 2012 | PPP1R3B          |
| FASTING GLUCOSE      | rs1280     | T | C | 0.026 | Scott et al. 2012 | SLC2A2           |
| FASTING GLUCOSE      | rs780094   | C | T | 0.027 | Scott et al. 2012 | GCKR             |
| FASTING GLUCOSE      | rs11558471 | A | G | 0.029 | Scott et al. 2012 |                  |
| FASTING GLUCOSE      | rs2191349  | T | G | 0.029 | Scott et al. 2012 | DGKB/TMEM195     |
| FASTING GLUCOSE      | rs11195502 | C | T | 0.032 | Scott et al. 2012 | ADRA2A           |
| FASTING GLUCOSE      | rs6113722  | G | A | 0.035 | Scott et al. 2012 | FOXA2            |
| FASTING GLUCOSE      | rs16913693 | T | G | 0.043 | Scott et al. 2012 | IKBKAP           |
| FASTING GLUCOSE      | rs2908289  | A | G | 0.057 | Scott et al. 2012 |                  |
| FASTING GLUCOSE      | rs560887   | C | T | 0.071 | Scott et al. 2012 | G6PC2            |
| FASTING GLUCOSE      | rs10830963 | G | C | 0.078 | Scott et al. 2012 | MTNR1B           |
| FASTING INSULIN      | rs2972143  | G | A | 0.014 | Scott et al. 2012 | IRS1             |
| FASTING INSULIN      | rs2745353  | T | C | 0.014 | Scott et al. 2012 | RSPO3            |
| FASTING INSULIN      | rs1530559  | A | G | 0.015 | Scott et al. 2012 | YSK4             |
| FASTING INSULIN      | rs731839   | G | A | 0.015 | Scott et al. 2012 | PEPD             |
| FASTING INSULIN      | rs4865796  | A | G | 0.015 | Scott et al. 2012 | ARL15            |
| FASTING INSULIN      | rs2820436  | C | A | 0.015 | Scott et al. 2012 | LYPLAL1          |
| FASTING INSULIN      | rs1167800  | A | G | 0.016 | Scott et al. 2012 | HIP1             |
| FASTING INSULIN      | rs10195252 | T | C | 0.016 | Scott et al. 2012 | GRB14            |
| FASTING INSULIN      | rs9884482  | C | T | 0.017 | Scott et al. 2012 | TET2             |
| FASTING INSULIN      | rs860598   | A | G | 0.018 | Scott et al. 2012 |                  |
| FASTING INSULIN      | rs7903146  | C | T | 0.018 | Scott et al. 2012 | TCF7L2           |
| FASTING INSULIN      | rs780094   | C | T | 0.019 | Scott et al. 2012 | GCKR             |
| FASTING INSULIN      | rs1421085  | C | T | 0.02  | Scott et al. 2012 | FTO              |
| FASTING INSULIN      | rs983309   | T | G | 0.029 | Scott et al. 2012 | PPP1R3B          |
| Favourable Adiposity | rs11045172 | C | A | 0.012 | Ji et al. 2019    | EBP2-PDE3A       |
| Favourable Adiposity | rs11118306 | A | G | 0.023 | Ji et al. 2019    | LYPLAL1-SLC30A10 |
| Favourable Adiposity | rs13389219 | T | C | 0.023 | Ji et al. 2019    | GRB14-COBL1      |
| Favourable Adiposity | rs1801282  | G | C | 0.031 | Ji et al. 2019    | PPARG            |
| Favourable Adiposity | rs2267373  | C | T | 0.025 | Ji et al. 2019    | MAFF             |
| Favourable Adiposity | rs2276936  | A | C | 0.016 | Ji et al. 2019    | FAM13A           |
| Favourable Adiposity | rs2943653  | C | T | 0.032 | Ji et al. 2019    | NYAP2-IRS1       |
| Favourable Adiposity | rs2980888  | C | T | 0.006 | Ji et al. 2019    | TRIB1--[         |
| Favourable Adiposity | rs40271    | C | T | 0.021 | Ji et al. 2019    | ANKRD55-MAP3K1   |

## SUPPLEMENTARY DATA

|                      |             |   |   |       |                    |                    |
|----------------------|-------------|---|---|-------|--------------------|--------------------|
| Favourable Adiposity | rs632057    | G | T | 0.009 | Ji et al. 2019     | CITED2             |
| Favourable Adiposity | rs7133378   | A | G | 0.026 | Ji et al. 2019     | DNAH10             |
| Favourable Adiposity | rs7258937   | T | C | 0.015 | Ji et al. 2019     | PEPD               |
| Favourable Adiposity | rs972283    | A | G | 0.017 | Ji et al. 2019     | KLF14-MKLN1        |
| Favourable Adiposity | rs998584    | C | A | 0.016 | Ji et al. 2019     | VEGFA-C6orf223     |
| HDL CHOLESTEROL      | rs1011731   | A | G | 0.015 | Liu et al.         | DNM3:Intron        |
| HDL CHOLESTEROL      | rs1037378   | G | A | 0.015 | Liu et al.         | PDE3B:Intron       |
| HDL CHOLESTEROL      | rs10483776  | A | G | 0.02  | Liu et al.         | FUT8:Intron        |
| HDL CHOLESTEROL      | rs10861661  | A | C | 0.017 | Liu et al.         | RIC8B:Intron       |
| HDL CHOLESTEROL      | rs10968576  | A | G | 0.017 | Liu et al.         | LINGO2:Intron      |
| HDL CHOLESTEROL      | rs11553746  | T | C | 0.015 | Liu et al.         | ACP1:Thr95Ile      |
| HDL CHOLESTEROL      | rs12055786  | C | T | 0.021 | Liu et al.         | RGS17:Intron       |
| HDL CHOLESTEROL      | rs13379043  | C | T | 0.017 | Liu et al.         | C14orf43:Intron    |
| HDL CHOLESTEROL      | rs146179438 | C | A | 0.063 | Liu et al.         | CDC25A:Gln25His    |
| HDL CHOLESTEROL      | rs16928809  | G | A | 0.029 | Liu et al.         | SLC22A18:Intron    |
| HDL CHOLESTEROL      | rs17189743  | A | G | 0.04  | Liu et al.         | TSPYL6:Arg246Cys   |
| HDL CHOLESTEROL      | rs2074158   | T | C | 0.02  | Liu et al.         | DHX58:Gln425Arg    |
| HDL CHOLESTEROL      | rs2303108   | T | C | 0.015 | Liu et al.         | ZC3H4:Intron       |
| HDL CHOLESTEROL      | rs2785990   | C | T | 0.015 | Liu et al.         | LYPLAL1:Intergenic |
| HDL CHOLESTEROL      | rs28932178  | C | T | 0.02  | Liu et al.         | NSD1:Ser457Pro     |
| HDL CHOLESTEROL      | rs35169799  | C | T | 0.039 | Liu et al.         | PLCB3:Ser778Leu    |
| HDL CHOLESTEROL      | rs4871137   | G | T | 0.022 | Liu et al.         | KCND3:Intergenic   |
| HDL CHOLESTEROL      | rs4976033   | A | G | 0.015 | Liu et al.         | IGFN1:Intergenic   |
| HDL CHOLESTEROL      | rs622082    | A | G | 0.017 | Liu et al.         | IGHMBP2:Thr671Ala  |
| HDL CHOLESTEROL      | rs7076938   | T | C | 0.019 | Liu et al.         | PLOD1:Intergenic   |
| HDL CHOLESTEROL      | rs7136716   | G | A | 0.021 | Liu et al.         | AVPR1B:Intergenic  |
| HDL CHOLESTEROL      | rs746463    | C | T | 0.017 | Liu et al.         | ZC3H12C:Intron     |
| HDL CHOLESTEROL      | rs76116020  | A | G | 0.041 | Liu et al.         | TMED6:Phe6Leu      |
| HDL CHOLESTEROL      | rs78074706  | G | A | 0.053 | Liu et al.         | ANKS3:Arg286Trp    |
| HDL CHOLESTEROL      | rs8099014   | A | C | 0.015 | Liu et al.         | VPS13D:Intergenic  |
| HDL CHOLESTEROL      | rs900399    | G | A | 0.019 | Liu et al.         | SEMA4A:Intergenic  |
| HDL CHOLESTEROL      | rs9816226   | T | A | 0.028 | Liu et al.         | B4GALT3:Intergenic |
| HDL CHOLESTEROL      | rs10019888  | A | G | 0.027 | Willer et al. 2013 | C4orf52            |
| HDL CHOLESTEROL      | rs1047891   | C | C | 0.027 | Willer et al. 2013 | CPS1               |
| HDL CHOLESTEROL      | rs1121980   | G | A | 0.02  | Willer et al. 2013 | FTO                |
| HDL CHOLESTEROL      | rs11246602  | C | T | 0.034 | Willer et al. 2013 | OR4C46             |
| HDL CHOLESTEROL      | rs11613352  | T | C | 0.028 | Willer et al. 2013 | LRP1               |
| HDL CHOLESTEROL      | rs11869286  | C | G | 0.032 | Willer et al. 2013 | STARD3             |
| HDL CHOLESTEROL      | rs12145743  | G | T | 0.02  | Willer et al. 2013 | HDGF, PMVK         |
| HDL CHOLESTEROL      | rs12328675  | C | T | 0.045 | Willer et al. 2013 | COBLL1             |
| HDL CHOLESTEROL      | rs12678919  | G | A | 0.155 | Willer et al. 2013 | LPL                |



## SUPPLEMENTARY DATA

|                 |            |   |   |       |                    |                     |
|-----------------|------------|---|---|-------|--------------------|---------------------|
| HDL CHOLESTEROL | rs12748152 | C | T | 0.051 | Willer et al. 2013 | PIGV, NROB2         |
| HDL CHOLESTEROL | rs12801636 | A | G | 0.024 | Willer et al. 2013 | KAT5                |
| HDL CHOLESTEROL | rs12967135 | G | A | 0.026 | Willer et al. 2013 | MC4R                |
| HDL CHOLESTEROL | rs13076253 | A | C | 0.028 | Willer et al. 2013 | CPNE4               |
| HDL CHOLESTEROL | rs13107325 | C | T | 0.071 | Willer et al. 2013 | SLC39A8             |
| HDL CHOLESTEROL | rs13326165 | A | G | 0.029 | Willer et al. 2013 | STAB1               |
| HDL CHOLESTEROL | rs1532085  | A | G | 0.107 | Willer et al. 2013 | LIPC                |
| HDL CHOLESTEROL | rs1689800  | A | G | 0.034 | Willer et al. 2013 | ZNF648              |
| HDL CHOLESTEROL | rs16942887 | A | G | 0.083 | Willer et al. 2013 | LCAT                |
| HDL CHOLESTEROL | rs17145738 | T | C | 0.041 | Willer et al. 2013 | MLXIPL              |
| HDL CHOLESTEROL | rs17173637 | T | C | 0.036 | Willer et al. 2013 | TMEM176A            |
| HDL CHOLESTEROL | rs174546   | C | T | 0.039 | Willer et al. 2013 | FADS1, FADS2, FADS3 |
| HDL CHOLESTEROL | rs17695224 | G | A | 0.029 | Willer et al. 2013 | HAS1                |
| HDL CHOLESTEROL | rs1800961  | C | T | 0.127 | Willer et al. 2013 | HNF4A               |
| HDL CHOLESTEROL | rs181362   | C | T | 0.038 | Willer et al. 2013 | UBE2L3              |
| HDL CHOLESTEROL | rs1883025  | C | T | 0.07  | Willer et al. 2013 | ABCA1               |
| HDL CHOLESTEROL | rs1936800  | C | T | 0.02  | Willer et al. 2013 | RSPO3               |
| HDL CHOLESTEROL | rs2013208  | T | C | 0.025 | Willer et al. 2013 | RBM5                |
| HDL CHOLESTEROL | rs2290547  | G | A | 0.03  | Willer et al. 2013 | SETD2               |
| HDL CHOLESTEROL | rs2293889  | G | T | 0.031 | Willer et al. 2013 | TRPS1               |
| HDL CHOLESTEROL | rs2602836  | A | G | 0.019 | Willer et al. 2013 | ADH5                |
| HDL CHOLESTEROL | rs2606736  | C | T | 0.025 | Willer et al. 2013 | ATG7                |
| HDL CHOLESTEROL | rs2652834  | G | A | 0.029 | Willer et al. 2013 | LACTB               |
| HDL CHOLESTEROL | rs2923084  | A | G | 0.026 | Willer et al. 2013 | AMPD3               |
| HDL CHOLESTEROL | rs2925979  | C | T | 0.035 | Willer et al. 2013 | CMIP                |
| HDL CHOLESTEROL | rs2954029  | T | A | 0.04  | Willer et al. 2013 | TRIB1               |
| HDL CHOLESTEROL | rs2972146  | G | T | 0.032 | Willer et al. 2013 | IRS1                |
| HDL CHOLESTEROL | rs3136441  | C | T | 0.055 | Willer et al. 2013 | LRP4                |
| HDL CHOLESTEROL | rs3764261  | A | C | 0.241 | Willer et al. 2013 | CETP                |
| HDL CHOLESTEROL | rs3822072  | G | A | 0.025 | Willer et al. 2013 | FAM13A              |
| HDL CHOLESTEROL | rs386000   | C | G | 0.048 | Willer et al. 2013 | LILRA3              |
| HDL CHOLESTEROL | rs4129767  | A | G | 0.024 | Willer et al. 2013 | PGS1                |
| HDL CHOLESTEROL | rs4142995  | G | T | 0.026 | Willer et al. 2013 | SNX13               |
| HDL CHOLESTEROL | rs4148008  | C | G | 0.028 | Willer et al. 2013 | ABCA8               |
| HDL CHOLESTEROL | rs4420638  | A | G | 0.067 | Willer et al. 2013 | APOE                |
| HDL CHOLESTEROL | rs4650994  | G | A | 0.021 | Willer et al. 2013 | ANGPTL1             |
| HDL CHOLESTEROL | rs4660293  | A | G | 0.035 | Willer et al. 2013 | PABPC4              |
| HDL CHOLESTEROL | rs4731702  | T | C | 0.029 | Willer et al. 2013 | KLF14               |
| HDL CHOLESTEROL | rs4759375  | T | C | 0.056 | Willer et al. 2013 | SBNO1               |
| HDL CHOLESTEROL | rs4765127  | T | G | 0.032 | Willer et al. 2013 | ZNF664              |
| HDL CHOLESTEROL | rs4846914  | A | G | 0.048 | Willer et al. 2013 | GALNT2              |

## SUPPLEMENTARY DATA

|                 |             |   |   |       |                    |                    |
|-----------------|-------------|---|---|-------|--------------------|--------------------|
| HDL CHOLESTEROL | rs4917014   | G | T | 0.022 | Willer et al. 2013 | IKZF1              |
| HDL CHOLESTEROL | rs4983559   | G | A | 0.02  | Willer et al. 2013 | ZBTB42, AKT1       |
| HDL CHOLESTEROL | rs499974    | C | A | 0.026 | Willer et al. 2013 | MOGAT2, DGAT2      |
| HDL CHOLESTEROL | rs581080    | C | G | 0.042 | Willer et al. 2013 | TTC39B             |
| HDL CHOLESTEROL | rs605066    | T | C | 0.028 | Willer et al. 2013 | CITED2             |
| HDL CHOLESTEROL | rs6065906   | T | C | 0.059 | Willer et al. 2013 | PLTP               |
| HDL CHOLESTEROL | rs6450176   | G | A | 0.025 | Willer et al. 2013 | ARL15              |
| HDL CHOLESTEROL | rs6805251   | T | C | 0.02  | Willer et al. 2013 | GSK3B              |
| HDL CHOLESTEROL | rs702485    | G | A | 0.024 | Willer et al. 2013 | DAGLB              |
| HDL CHOLESTEROL | rs7134375   | A | C | 0.021 | Willer et al. 2013 | PDE3A              |
| HDL CHOLESTEROL | rs7134594   | T | C | 0.035 | Willer et al. 2013 | MVK                |
| HDL CHOLESTEROL | rs7241918   | T | G | 0.09  | Willer et al. 2013 | LIPG               |
| HDL CHOLESTEROL | rs7255436   | A | C | 0.032 | Willer et al. 2013 | ANGPTL4            |
| HDL CHOLESTEROL | rs731839    | A | G | 0.022 | Willer et al. 2013 | PEPD               |
| HDL CHOLESTEROL | rs737337    | T | C | 0.057 | Willer et al. 2013 | ANGPTL8            |
| HDL CHOLESTEROL | rs7941030   | C | T | 0.028 | Willer et al. 2013 | UBASH3B            |
| HDL CHOLESTEROL | rs838880    | C | T | 0.048 | Willer et al. 2013 | SCARB1             |
| HDL CHOLESTEROL | rs964184    | C | G | 0.107 | Willer et al. 2013 | APOA1              |
| HDL CHOLESTEROL | rs970548    | C | A | 0.026 | Willer et al. 2013 | MARCH8, ALOX5      |
| HDL CHOLESTEROL | rs998584    | C | A | 0.026 | Willer et al. 2013 | VEGFA              |
| HDL CHOLESTEROL | rs9987289   | G | A | 0.082 | Willer et al. 2013 | PPP1R3B            |
| LDL CHOLESTEROL | rs1016988   | T | C | 0.02  | Liu et al.         | CD101:Intergenic   |
| LDL CHOLESTEROL | rs10885997  | G | A | 0.015 | Liu et al.         | PNLIPRP2:Gln387Arg |
| LDL CHOLESTEROL | rs11080150  | A | G | 0.019 | Liu et al.         | NF1:Intron         |
| LDL CHOLESTEROL | rs13146272  | C | A | 0.015 | Liu et al.         | CYP4V2:Gln259Lys   |
| LDL CHOLESTEROL | rs13379043  | T | C | 0.018 | Liu et al.         | C14orf43:Intron    |
| LDL CHOLESTEROL | rs147032017 | C | T | 0.091 | Liu et al.         | ZFPM1:Asp91Asp     |
| LDL CHOLESTEROL | rs1891110   | A | G | 0.021 | Liu et al.         | FAM24B:Pro2Leu     |
| LDL CHOLESTEROL | rs201148465 | C | A | 0.21  | Liu et al.         | HIST1H1B:Ala6Ala   |
| LDL CHOLESTEROL | rs201596848 | C | T | 0.255 | Liu et al.         | ZNF574:Arg734Cys   |
| LDL CHOLESTEROL | rs2076674   | C | T | 0.018 | Liu et al.         | SLC25A17:Intron    |
| LDL CHOLESTEROL | rs2125345   | T | C | 0.024 | Liu et al.         | UNK:Intron         |
| LDL CHOLESTEROL | rs2239619   | A | C | 0.018 | Liu et al.         | HSPG2:Intergenic   |
| LDL CHOLESTEROL | rs28929474  | T | C | 0.081 | Liu et al.         | SERPINA1:Glu366Lys |
| LDL CHOLESTEROL | rs351855    | G | A | 0.018 | Liu et al.         | FGFR4:Gly388Arg    |
| LDL CHOLESTEROL | rs3812594   | G | A | 0.018 | Liu et al.         | SEC16A:Arg1039Cys  |
| LDL CHOLESTEROL | rs4745      | A | T | 0.015 | Liu et al.         | EFNA1:Asp137Val    |
| LDL CHOLESTEROL | rs4809330   | A | G | 0.015 | Liu et al.         | ZGPAT:Intron       |
| LDL CHOLESTEROL | rs6062343   | G | A | 0.014 | Liu et al.         | TCEA2:Intron       |
| LDL CHOLESTEROL | rs61754230  | T | C | 0.057 | Liu et al.         | RAB21:Ser224Phe    |
| LDL CHOLESTEROL | rs635634    | T | C | 0.069 | Liu et al.         | IL6R:Intergenic    |

## SUPPLEMENTARY DATA

|                 |            |   |   |       |                    |                     |
|-----------------|------------|---|---|-------|--------------------|---------------------|
| LDL CHOLESTEROL | rs67710536 | C | A | 0.028 | Liu et al.         | RPS6:Utr3           |
| LDL CHOLESTEROL | rs6818397  | T | G | 0.022 | Liu et al.         | RGS12:Intron        |
| LDL CHOLESTEROL | rs704      | A | G | 0.021 | Liu et al.         | VTN:Thr400Met       |
| LDL CHOLESTEROL | rs77375493 | G | T | 0.3   | Liu et al.         | JAK2                |
| LDL CHOLESTEROL | rs9646133  | G | T | 0.019 | Liu et al.         | FLAD1:Intergenic    |
| LDL CHOLESTEROL | rs976002   | G | A | 0.023 | Liu et al.         | TMPRSS11E:Tyr303Cys |
| LDL CHOLESTEROL | rs10102164 | A | G | 0.032 | Willer et al. 2013 | SOX17               |
| LDL CHOLESTEROL | rs10401969 | T | C | 0.118 | Willer et al. 2013 | CILP2               |
| LDL CHOLESTEROL | rs10490626 | G | A | 0.051 | Willer et al. 2013 | INSIG2              |
| LDL CHOLESTEROL | rs11065987 | A | G | 0.027 | Willer et al. 2013 | BRAP                |
| LDL CHOLESTEROL | rs11136341 | G | A | 0.045 | Willer et al. 2013 | PLEC1               |
| LDL CHOLESTEROL | rs11220462 | A | G | 0.059 | Willer et al. 2013 | ST3GAL4             |
| LDL CHOLESTEROL | rs11563251 | T | C | 0.035 | Willer et al. 2013 | UGT1A1              |
| LDL CHOLESTEROL | rs1169288  | C | A | 0.038 | Willer et al. 2013 | HNF1A               |
| LDL CHOLESTEROL | rs12027135 | T | A | 0.03  | Willer et al. 2013 | LDLRAP1             |
| LDL CHOLESTEROL | rs1250229  | C | T | 0.024 | Willer et al. 2013 | FN1                 |
| LDL CHOLESTEROL | rs12670798 | C | T | 0.034 | Willer et al. 2013 | DNAH11              |
| LDL CHOLESTEROL | rs12748152 | T | C | 0.05  | Willer et al. 2013 | PIGV, NROB2         |
| LDL CHOLESTEROL | rs12916    | C | T | 0.073 | Willer et al. 2013 | HMGCR               |
| LDL CHOLESTEROL | rs1367117  | A | G | 0.119 | Willer et al. 2013 | APOB                |
| LDL CHOLESTEROL | rs1564348  | C | T | 0.048 | Willer et al. 2013 | LPA                 |
| LDL CHOLESTEROL | rs17404153 | G | T | 0.034 | Willer et al. 2013 | ACAD11              |
| LDL CHOLESTEROL | rs174546   | C | T | 0.051 | Willer et al. 2013 | FADS1, FADS2, FADS3 |
| LDL CHOLESTEROL | rs1800562  | G | A | 0.062 | Willer et al. 2013 | HFE                 |
| LDL CHOLESTEROL | rs1801689  | C | A | 0.103 | Willer et al. 2013 | APOH, PRXCA         |
| LDL CHOLESTEROL | rs2000999  | A | G | 0.065 | Willer et al. 2013 | HPR                 |
| LDL CHOLESTEROL | rs2030746  | T | C | 0.021 | Willer et al. 2013 | LOC84931            |
| LDL CHOLESTEROL | rs2072183  | C | G | 0.039 | Willer et al. 2013 | NPC1L1              |
| LDL CHOLESTEROL | rs2081687  | T | C | 0.031 | Willer et al. 2013 | CYP7A1              |
| LDL CHOLESTEROL | rs2131925  | T | G | 0.049 | Willer et al. 2013 | ANGPTL3             |
| LDL CHOLESTEROL | rs2255141  | A | G | 0.03  | Willer et al. 2013 | GPAM                |
| LDL CHOLESTEROL | rs2328223  | C | A | 0.03  | Willer et al. 2013 | SNX5                |
| LDL CHOLESTEROL | rs2479409  | G | A | 0.064 | Willer et al. 2013 | PCSK9               |
| LDL CHOLESTEROL | rs2642442  | T | C | 0.036 | Willer et al. 2013 | MOSC1               |
| LDL CHOLESTEROL | rs267733   | A | G | 0.033 | Willer et al. 2013 | ANXA9, CERS2        |
| LDL CHOLESTEROL | rs2710642  | A | G | 0.024 | Willer et al. 2013 | EHBP1               |
| LDL CHOLESTEROL | rs2902940  | A | G | 0.027 | Willer et al. 2013 | MAFB                |
| LDL CHOLESTEROL | rs2954029  | A | T | 0.056 | Willer et al. 2013 | TRIB1               |
| LDL CHOLESTEROL | rs314253   | T | C | 0.024 | Willer et al. 2013 | DLG4                |
| LDL CHOLESTEROL | rs3177928  | A | G | 0.045 | Willer et al. 2013 | HLA                 |
| LDL CHOLESTEROL | rs364585   | G | A | 0.025 | Willer et al. 2013 | SPTLC3              |

## SUPPLEMENTARY DATA

|                         |            |   |   |       |                    |               |
|-------------------------|------------|---|---|-------|--------------------|---------------|
| LDL CHOLESTEROL         | rs3757354  | C | T | 0.038 | Willer et al. 2013 | MYLIP         |
| LDL CHOLESTEROL         | rs3764261  | C | A | 0.053 | Willer et al. 2013 | CETP          |
| LDL CHOLESTEROL         | rs3780181  | A | G | 0.045 | Willer et al. 2013 | VLDLR         |
| LDL CHOLESTEROL         | rs4253776  | G | A | 0.031 | Willer et al. 2013 | PPARA         |
| LDL CHOLESTEROL         | rs4299376  | G | T | 0.081 | Willer et al. 2013 | ABCG5, ABCG58 |
| LDL CHOLESTEROL         | rs4420638  | G | A | 0.225 | Willer et al. 2013 | APOE          |
| LDL CHOLESTEROL         | rs4530754  | A | G | 0.028 | Willer et al. 2013 | CSNK1G3       |
| LDL CHOLESTEROL         | rs4722551  | C | T | 0.039 | Willer et al. 2013 | MIR148A       |
| LDL CHOLESTEROL         | rs4942486  | T | C | 0.024 | Willer et al. 2013 | BRCA2         |
| LDL CHOLESTEROL         | rs514230   | T | A | 0.036 | Willer et al. 2013 | IRF2BP2       |
| LDL CHOLESTEROL         | rs5763662  | T | C | 0.077 | Willer et al. 2013 | MTMR3         |
| LDL CHOLESTEROL         | rs6029526  | A | T | 0.044 | Willer et al. 2013 | TOP1          |
| LDL CHOLESTEROL         | rs629301   | T | G | 0.167 | Willer et al. 2013 | SORT1         |
| LDL CHOLESTEROL         | rs6511720  | G | T | 0.221 | Willer et al. 2013 | LDLR          |
| LDL CHOLESTEROL         | rs6882076  | C | T | 0.046 | Willer et al. 2013 | TIMD4         |
| LDL CHOLESTEROL         | rs7206971  | A | G | 0.029 | Willer et al. 2013 | OSBPL7        |
| LDL CHOLESTEROL         | rs7640978  | C | T | 0.039 | Willer et al. 2013 | CMTM6         |
| LDL CHOLESTEROL         | rs8017377  | A | G | 0.03  | Willer et al. 2013 | NYNRIN        |
| LDL CHOLESTEROL         | rs9488822  | A | T | 0.031 | Willer et al. 2013 | FRK           |
| LDL CHOLESTEROL         | rs964184   | G | C | 0.086 | Willer et al. 2013 | APOA1         |
| LDL CHOLESTEROL         | rs9987289  | G | A | 0.071 | Willer et al. 2013 | PPP1R3B       |
| SYSTOLIC BLOOD PRESSURE | rs1813353  | T | C | 0.569 | Ehret et al. 2011  | CACNB2        |
| SYSTOLIC BLOOD PRESSURE | rs2932538  | G | A | 0.388 | Ehret et al. 2011  | MOV10         |
| SYSTOLIC BLOOD PRESSURE | rs381815   | T | C | 0.575 | Ehret et al. 2011  | PLEKHA7       |
| SYSTOLIC BLOOD PRESSURE | rs4373814  | C | G | 0.373 | Ehret et al. 2011  | CACNB2        |
| SYSTOLIC BLOOD PRESSURE | rs4590817  | G | C | 0.646 | Ehret et al. 2011  | C10orf107     |
| SYSTOLIC BLOOD PRESSURE | rs6015450  | G | A | 0.896 | Ehret et al. 2011  | EDN3, GNAS    |
| SYSTOLIC BLOOD PRESSURE | rs7129220  | A | G | 0.619 | Ehret et al. 2011  | ADM           |
| SYSTOLIC BLOOD PRESSURE | rs10077885 | C | A | 0.284 | Ehret et al. 2016  | TRIM36        |
| SYSTOLIC BLOOD PRESSURE | rs10760117 | T | G | 0.283 | Ehret et al. 2016  | PSMD5         |
| SYSTOLIC BLOOD PRESSURE | rs11128722 | G | A | 0.31  | Ehret et al. 2016  | FGD5          |
| SYSTOLIC BLOOD PRESSURE | rs11556924 | C | T | 0.271 | Ehret et al. 2016  | ZC3HC1        |
| SYSTOLIC BLOOD PRESSURE | rs1156725  | C | T | 0.447 | Ehret et al. 2016  | PLEKHA7       |
| SYSTOLIC BLOOD PRESSURE | rs11953630 | C | T | 0.412 | Ehret et al. 2016  | EBF1          |
| SYSTOLIC BLOOD PRESSURE | rs12247028 | G | A | 0.364 | Ehret et al. 2016  | SYNPO2L       |
| SYSTOLIC BLOOD PRESSURE | rs12627651 | A | G | 0.391 | Ehret et al. 2016  | CRYAA, SIK1   |
| SYSTOLIC BLOOD PRESSURE | rs12656497 | C | T | 0.487 | Ehret et al. 2016  | NPR3, C5orf23 |
| SYSTOLIC BLOOD PRESSURE | rs12705390 | A | G | 0.619 | Ehret et al. 2016  | PIK3C         |
| SYSTOLIC BLOOD PRESSURE | rs12940887 | T | C | 0.362 | Ehret et al. 2016  | ZNF652        |
| SYSTOLIC BLOOD PRESSURE | rs12958173 | A | C | 0.361 | Ehret et al. 2016  | SETBP1        |
| SYSTOLIC BLOOD PRESSURE | rs13107325 | C | T | 0.837 | Ehret et al. 2016  | SLC39A8       |

## SUPPLEMENTARY DATA

|                         |            |   |   |       |                   |                        |
|-------------------------|------------|---|---|-------|-------------------|------------------------|
| SYSTOLIC BLOOD PRESSURE | rs1327235  | G | A | 0.395 | Ehret et al. 2016 | JAG1                   |
| SYSTOLIC BLOOD PRESSURE | rs1361831  | C | T | 0.482 | Ehret et al. 2016 | RSPO3                  |
| SYSTOLIC BLOOD PRESSURE | rs1371182  | C | T | 0.444 | Ehret et al. 2016 | FIGN, GRB14            |
| SYSTOLIC BLOOD PRESSURE | rs1458038  | T | C | 0.659 | Ehret et al. 2016 | FGF5                   |
| SYSTOLIC BLOOD PRESSURE | rs1620668  | G | A | 0.535 | Ehret et al. 2016 | ST7L, CAPZA1, MOV10    |
| SYSTOLIC BLOOD PRESSURE | rs17010957 | C | T | 0.498 | Ehret et al. 2016 | ARHGAP24               |
| SYSTOLIC BLOOD PRESSURE | rs17037390 | G | A | 0.908 | Ehret et al. 2016 | MTHFR, NPPB            |
| SYSTOLIC BLOOD PRESSURE | rs17608766 | C | T | 0.658 | Ehret et al. 2016 | GOSR2                  |
| SYSTOLIC BLOOD PRESSURE | rs1799945  | G | C | 0.627 | Ehret et al. 2016 | HFE                    |
| SYSTOLIC BLOOD PRESSURE | rs2291435  | C | T | 0.344 | Ehret et al. 2016 | TBC1D1, FLJ13197       |
| SYSTOLIC BLOOD PRESSURE | rs2493134  | C | T | 0.413 | Ehret et al. 2016 | AGT                    |
| SYSTOLIC BLOOD PRESSURE | rs2521501  | T | A | 0.65  | Ehret et al. 2016 | FURIN, FES             |
| SYSTOLIC BLOOD PRESSURE | rs2586886  | C | T | 0.404 | Ehret et al. 2016 | KCNK3                  |
| SYSTOLIC BLOOD PRESSURE | rs2594992  | C | A | 0.334 | Ehret et al. 2016 | HRH1, ATG7             |
| SYSTOLIC BLOOD PRESSURE | rs2898290  | T | C | 0.377 | Ehret et al. 2016 | BLK, GATA4             |
| SYSTOLIC BLOOD PRESSURE | rs2969070  | G | A | 0.298 | Ehret et al. 2016 | CHST12, LFNG           |
| SYSTOLIC BLOOD PRESSURE | rs3184504  | T | C | 0.598 | Ehret et al. 2016 | SH2B3                  |
| SYSTOLIC BLOOD PRESSURE | rs3735533  | C | T | 0.798 | Ehret et al. 2016 | HOTTIP, EVX            |
| SYSTOLIC BLOOD PRESSURE | rs3741378  | C | T | 0.486 | Ehret et al. 2016 | SIPA1                  |
| SYSTOLIC BLOOD PRESSURE | rs4247374  | C | T | 0.593 | Ehret et al. 2016 | INSR                   |
| SYSTOLIC BLOOD PRESSURE | rs4691707  | G | A | 0.349 | Ehret et al. 2016 | GUCY1A3, GUCY1B3       |
| SYSTOLIC BLOOD PRESSURE | rs592373   | A | G | 0.484 | Ehret et al. 2016 | LSP1, TNNT3            |
| SYSTOLIC BLOOD PRESSURE | rs6271     | C | T | 0.591 | Ehret et al. 2016 | DBH                    |
| SYSTOLIC BLOOD PRESSURE | rs633185   | C | G | 0.565 | Ehret et al. 2016 | FLJ32810, TMEM133      |
| SYSTOLIC BLOOD PRESSURE | rs6442101  | T | C | 0.396 | Ehret et al. 2016 | MAP4                   |
| SYSTOLIC BLOOD PRESSURE | rs6779380  | C | T | 0.439 | Ehret et al. 2016 | MECOM                  |
| SYSTOLIC BLOOD PRESSURE | rs6919440  | G | A | 0.337 | Ehret et al. 2016 | ZNF318, ABCC10         |
| SYSTOLIC BLOOD PRESSURE | rs7103648  | G | A | 0.335 | Ehret et al. 2016 | RAPSN, PSMC3, SLC39A13 |
| SYSTOLIC BLOOD PRESSURE | rs711737   | A | C | 0.334 | Ehret et al. 2016 | SLC4A7                 |
| SYSTOLIC BLOOD PRESSURE | rs7213273  | G | A | 0.413 | Ehret et al. 2016 | PLCD3                  |
| SYSTOLIC BLOOD PRESSURE | rs740746   | A | G | 0.486 | Ehret et al. 2016 | ADRB1                  |
| SYSTOLIC BLOOD PRESSURE | rs7515635  | T | C | 0.307 | Ehret et al. 2016 | HIVEP3                 |
| SYSTOLIC BLOOD PRESSURE | rs751984   | T | C | 0.407 | Ehret et al. 2016 | LRRC10B                |
| SYSTOLIC BLOOD PRESSURE | rs880315   | C | T | 0.475 | Ehret et al. 2016 | CASZ1                  |
| SYSTOLIC BLOOD PRESSURE | rs932764   | G | A | 0.495 | Ehret et al. 2016 | PLCE1                  |
| SYSTOLIC BLOOD PRESSURE | rs943037   | C | T | 1.133 | Ehret et al. 2016 | CYP17A1, NT5C2         |
| SYSTOLIC BLOOD PRESSURE | rs1008058  | A | G | 0.554 | Surendram et al.  | PRDM6                  |
| SYSTOLIC BLOOD PRESSURE | rs11229457 | C | T | 0.312 | Surendram et al.  | OR5B12                 |
| SYSTOLIC BLOOD PRESSURE | rs1378942  | C | A | 0.613 | Surendram et al.  | CYP1A1-ULK3            |
| SYSTOLIC BLOOD PRESSURE | rs17249754 | G | A | 0.928 | Surendram et al.  | ATP2B1                 |
| SYSTOLIC BLOOD PRESSURE | rs34591516 | T | C | 0.636 | Surendram et al.  | GPR20                  |

## SUPPLEMENTARY DATA

|                         |             |   |   |       |                    |                    |
|-------------------------|-------------|---|---|-------|--------------------|--------------------|
| SYSTOLIC BLOOD PRESSURE | rs35529250  | C | T | 1.537 | Surendram et al.   | RBM47              |
| SYSTOLIC BLOOD PRESSURE | rs4387287   | A | C | 0.338 | Surendram et al.   | OBFC1              |
| SYSTOLIC BLOOD PRESSURE | rs4728142   | G | A | 0.224 | Surendram et al.   | Intergenic         |
| SYSTOLIC BLOOD PRESSURE | rs61760904  | T | C | 1.499 | Surendram et al.   | RRAS               |
| SYSTOLIC BLOOD PRESSURE | rs7406910   | C | T | 0.456 | Surendram et al.   | HOXB7              |
| SYSTOLIC BLOOD PRESSURE | rs805303    | G | A | 0.376 | Surendram et al.   | BAT2, BAT5         |
| SYSTOLIC BLOOD PRESSURE | rs9349379   | A | G | 0.289 | Surendram et al.   | PHACTR1            |
| SYSTOLIC BLOOD PRESSURE | rs10059921  | G | T | 0.526 | Warren et al. 2017 | TMEM161B           |
| SYSTOLIC BLOOD PRESSURE | rs10922502  | G | A | 0.382 | Warren et al. 2017 | GTF2B              |
| SYSTOLIC BLOOD PRESSURE | rs112184198 | G | A | 0.659 | Warren et al. 2017 | PAX2               |
| SYSTOLIC BLOOD PRESSURE | rs11643209  | G | T | 0.339 | Warren et al. 2017 | CFDP1              |
| SYSTOLIC BLOOD PRESSURE | rs12941318  | C | T | 0.269 | Warren et al. 2017 | CRK                |
| SYSTOLIC BLOOD PRESSURE | rs13112725  | C | G | 0.435 | Warren et al. 2017 | NPNT               |
| SYSTOLIC BLOOD PRESSURE | rs13238550  | A | G | 0.331 | Warren et al. 2017 | MKLN1              |
| SYSTOLIC BLOOD PRESSURE | rs13420463  | A | G | 0.356 | Warren et al. 2017 | PRKD3              |
| SYSTOLIC BLOOD PRESSURE | rs2467099   | C | T | 0.307 | Warren et al. 2017 | ACOX1              |
| SYSTOLIC BLOOD PRESSURE | rs35199222  | A | G | 0.322 | Warren et al. 2017 | ABHD17C            |
| SYSTOLIC BLOOD PRESSURE | rs3820068   | A | G | 0.425 | Warren et al. 2017 | CELA2A             |
| SYSTOLIC BLOOD PRESSURE | rs55780018  | C | T | 0.391 | Warren et al. 2017 | METTL21A,          |
| SYSTOLIC BLOOD PRESSURE | rs6487543   | A | G | 0.3   | Warren et al. 2017 | SSPN/ITPR2         |
| SYSTOLIC BLOOD PRESSURE | rs6595838   | A | G | 0.344 | Warren et al. 2017 | FBN2               |
| SYSTOLIC BLOOD PRESSURE | rs6911827   | T | C | 0.296 | Warren et al. 2017 | CASC15             |
| SYSTOLIC BLOOD PRESSURE | rs7562      | T | C | 0.263 | Warren et al. 2017 | FOSL2              |
| SYSTOLIC BLOOD PRESSURE | rs78648104  | C | T | 0.481 | Warren et al. 2017 | TFAP2D             |
| SYSTOLIC BLOOD PRESSURE | rs8016306   | A | G | 0.335 | Warren et al. 2017 | PPP2R5E            |
| SYSTOLIC BLOOD PRESSURE | rs894344    | G | A | 0.258 | Warren et al. 2017 | ZFAT               |
| SYSTOLIC BLOOD PRESSURE | rs9549328   | T | C | 0.318 | Warren et al. 2017 | MCF2L              |
| SYSTOLIC BLOOD PRESSURE | rs9888615   | C | T | 0.318 | Warren et al. 2017 | FERMT2             |
| TRIGLYCERIDES           | rs1011731   | G | A | 0.015 | Liu et al.         | DNM3:Intron        |
| TRIGLYCERIDES           | rs10861661  | C | A | 0.019 | Liu et al.         | RIC8B:Intron       |
| TRIGLYCERIDES           | rs138358301 | G | A | 0.15  | Liu et al.         | SLC25A30:Phe280Leu |
| TRIGLYCERIDES           | rs26008     | T | C | 0.028 | Liu et al.         | FNIP1:Gln620Arg    |
| TRIGLYCERIDES           | rs2785990   | T | C | 0.016 | Liu et al.         | LYPLAL1:Intergenic |
| TRIGLYCERIDES           | rs35169799  | T | C | 0.038 | Liu et al.         | PLCB3:Ser778Leu    |
| TRIGLYCERIDES           | rs35665085  | A | G | 0.032 | Liu et al.         | CECR5:Thr149Met    |
| TRIGLYCERIDES           | rs3769823   | G | A | 0.017 | Liu et al.         | CASP8:Lys14Arg     |
| TRIGLYCERIDES           | rs3803357   | C | A | 0.017 | Liu et al.         | BAHD1:Gln298Lys    |
| TRIGLYCERIDES           | rs3927680   | T | A | 0.018 | Liu et al.         | OR6P1:Intergenic   |
| TRIGLYCERIDES           | rs3947      | A | G | 0.024 | Liu et al.         | CTSB:Utr3          |
| TRIGLYCERIDES           | rs41274050  | T | C | 0.1   | Liu et al.         | A1CF:Gly398Ser     |
| TRIGLYCERIDES           | rs41302559  | G | A | 0.154 | Liu et al.         | PCK1:Arg483Gln     |

## SUPPLEMENTARY DATA

|               |            |   |   |       |                    |                     |
|---------------|------------|---|---|-------|--------------------|---------------------|
| TRIGLYCERIDES | rs4976033  | G | A | 0.018 | Liu et al.         | IGFN1:Intergenic    |
| TRIGLYCERIDES | rs6062343  | G | A | 0.018 | Liu et al.         | TCEA2:Intron        |
| TRIGLYCERIDES | rs7157785  | T | G | 0.023 | Liu et al.         | NPR1:Intergenic     |
| TRIGLYCERIDES | rs7901016  | C | T | 0.042 | Liu et al.         | CCDC109A:Intron     |
| TRIGLYCERIDES | rs7946     | C | T | 0.016 | Liu et al.         | PEMT:Val212Met      |
| TRIGLYCERIDES | rs797486   | A | C | 0.02  | Liu et al.         | ADAR:Intergenic     |
| TRIGLYCERIDES | rs900399   | A | G | 0.014 | Liu et al.         | SEMA4A:Intergenic   |
| TRIGLYCERIDES | rs10401969 | T | C | 0.121 | Willer et al. 2013 | CILP2               |
| TRIGLYCERIDES | rs10761731 | A | T | 0.031 | Willer et al. 2013 | JMJD1C              |
| TRIGLYCERIDES | rs11613352 | C | T | 0.028 | Willer et al. 2013 | LRP1                |
| TRIGLYCERIDES | rs11649653 | C | G | 0.027 | Willer et al. 2013 | CTF1                |
| TRIGLYCERIDES | rs11776767 | C | G | 0.022 | Willer et al. 2013 | PINX1               |
| TRIGLYCERIDES | rs1260326  | T | C | 0.115 | Willer et al. 2013 | GCKR                |
| TRIGLYCERIDES | rs12678919 | A | G | 0.17  | Willer et al. 2013 | LPL                 |
| TRIGLYCERIDES | rs12748152 | T | C | 0.037 | Willer et al. 2013 | PIGV, NROB2         |
| TRIGLYCERIDES | rs13238203 | C | T | 0.059 | Willer et al. 2013 | TYW1B               |
| TRIGLYCERIDES | rs1495741  | G | A | 0.04  | Willer et al. 2013 | NAT2                |
| TRIGLYCERIDES | rs1532085  | A | G | 0.031 | Willer et al. 2013 | LIPC                |
| TRIGLYCERIDES | rs17145738 | C | T | 0.115 | Willer et al. 2013 | MLXIPL              |
| TRIGLYCERIDES | rs174546   | T | C | 0.045 | Willer et al. 2013 | FADS1, FADS2, FADS3 |
| TRIGLYCERIDES | rs1832007  | A | G | 0.033 | Willer et al. 2013 | AKR1C4              |
| TRIGLYCERIDES | rs1936800  | T | C | 0.018 | Willer et al. 2013 | RSPO3               |
| TRIGLYCERIDES | rs2068888  | G | A | 0.024 | Willer et al. 2013 | CYP26A1             |
| TRIGLYCERIDES | rs2131925  | T | G | 0.066 | Willer et al. 2013 | ANGPTL3             |
| TRIGLYCERIDES | rs2247056  | C | T | 0.038 | Willer et al. 2013 | HLA-B               |
| TRIGLYCERIDES | rs2412710  | A | G | 0.099 | Willer et al. 2013 | CAPN3               |
| TRIGLYCERIDES | rs2929282  | T | A | 0.073 | Willer et al. 2013 | FRMD5               |
| TRIGLYCERIDES | rs2954029  | A | T | 0.076 | Willer et al. 2013 | TRIB1               |
| TRIGLYCERIDES | rs2972146  | T | G | 0.028 | Willer et al. 2013 | IRS1                |
| TRIGLYCERIDES | rs3198697  | C | T | 0.02  | Willer et al. 2013 | PDXDC1              |
| TRIGLYCERIDES | rs3764261  | C | A | 0.04  | Willer et al. 2013 | CETP                |
| TRIGLYCERIDES | rs38855    | A | G | 0.019 | Willer et al. 2013 | MET                 |
| TRIGLYCERIDES | rs442177   | T | G | 0.031 | Willer et al. 2013 | KLHL8               |
| TRIGLYCERIDES | rs4719841  | G | A | 0.023 | Willer et al. 2013 | MIR148A             |
| TRIGLYCERIDES | rs4765127  | G | T | 0.029 | Willer et al. 2013 | ZNF664              |
| TRIGLYCERIDES | rs4846914  | G | A | 0.04  | Willer et al. 2013 | GALNT2              |
| TRIGLYCERIDES | rs5756931  | T | C | 0.02  | Willer et al. 2013 | PLA2G6              |
| TRIGLYCERIDES | rs6065906  | C | T | 0.053 | Willer et al. 2013 | PLTP                |
| TRIGLYCERIDES | rs645040   | T | G | 0.029 | Willer et al. 2013 | MSL2L1              |
| TRIGLYCERIDES | rs6831256  | G | A | 0.026 | Willer et al. 2013 | LRPAP1              |
| TRIGLYCERIDES | rs6882076  | C | T | 0.029 | Willer et al. 2013 | TIMD4               |

## SUPPLEMENTARY DATA

|                 |            |   |   |             |                         |               |
|-----------------|------------|---|---|-------------|-------------------------|---------------|
| TRIGLYCERIDES   | rs7248104  | G | A | 0.022       | Willer et al. 2013      | INSR          |
| TRIGLYCERIDES   | rs731839   | G | A | 0.022       | Willer et al. 2013      | PEPD          |
| TRIGLYCERIDES   | rs8077889  | C | A | 0.025       | Willer et al. 2013      | MPP3          |
| TRIGLYCERIDES   | rs964184   | G | C | 0.234       | Willer et al. 2013      | APOA1         |
| TRIGLYCERIDES   | rs9686661  | T | C | 0.038       | Willer et al. 2013      | MAP3K1        |
| TRIGLYCERIDES   | rs9930333  | G | T | 0.021       | Willer et al. 2013      | FTO           |
| TRIGLYCERIDES   | rs998584   | A | C | 0.029       | Willer et al. 2013      | VEGFA         |
| TRIGLYCERIDES   | rs6054     | T | C | 0.14        | Liu et al.              | FGB:Pro206Leu |
| TYPE 2 DIABETES | rs17867832 | T | G | 0.086177696 | Cho et al. 2011         | GRM8          |
| TYPE 2 DIABETES | rs3734621  | C | A | 0.067658648 | Cho et al. 2011         | KIF6          |
| TYPE 2 DIABETES | rs3786897  | A | G | 0.029558802 | Cho et al. 2011         | PEPD          |
| TYPE 2 DIABETES | rs831571   | C | T | 0.029558802 | Cho et al. 2011         | PSMD6         |
| TYPE 2 DIABETES | rs9470794  | T | C | 0.009950331 | Cho et al. 2011         | ZFND3         |
| TYPE 2 DIABETES | rs2233580  | T | C | 0.58221562  | Fuchsberger et al. 2016 | PAX4          |
| TYPE 2 DIABETES | rs6813195  | C | T | 0.086177696 | Harder et al. 2015      | TMEM154       |
| TYPE 2 DIABETES | rs10278336 | A | G | 0.067658648 | Kong et al. 2009        | MOB2          |
| TYPE 2 DIABETES | rs12242953 | G | A | 0.067658648 | Kooner et al. 2011      | SRGN          |
| TYPE 2 DIABETES | rs16861329 | C | T | 0.029558802 | Kooner et al. 2011      | ST6GAL1       |
| TYPE 2 DIABETES | rs2007084  | G | A | 0.019802627 | Kooner et al. 2011      | ANPEP         |
| TYPE 2 DIABETES | rs4812829  | A | G | 0.058268908 | Kooner et al. 2011      | HNF4A         |
| TYPE 2 DIABETES | rs10401969 | C | T | 0.122217633 | Morris et al. 2012      | CILP2         |
| TYPE 2 DIABETES | rs10758593 | A | G | 0.058268908 | Morris et al. 2012      | GLIS3         |
| TYPE 2 DIABETES | rs10811661 | T | C | 0.165514438 | Morris et al. 2012      | CDKN2A/B      |
| TYPE 2 DIABETES | rs10830963 | G | C | 0.09531018  | Morris et al. 2012      | MTNR1B        |
| TYPE 2 DIABETES | rs10842994 | C | T | 0.09531018  | Morris et al. 2012      | KLHDC5        |
| TYPE 2 DIABETES | rs10923931 | T | G | 0.076961041 | Morris et al. 2012      | NOTCH2        |
| TYPE 2 DIABETES | rs1111875  | C | T | 0.104360015 | Morris et al. 2012      | HHEX, IDE     |
| TYPE 2 DIABETES | rs11257655 | T | C | 0.067658648 | Morris et al. 2012      | CDC123/CAMK1D |
| TYPE 2 DIABETES | rs11634397 | G | A | 0.048790164 | Morris et al. 2012      | ZFAND6        |
| TYPE 2 DIABETES | rs11651052 | A | G | 0.09531018  | Morris et al. 2012      | HNF1B         |
| TYPE 2 DIABETES | rs11717195 | T | C | 0.104360015 | Morris et al. 2012      | ADCY5         |
| TYPE 2 DIABETES | rs12427353 | G | C | 0.076961041 | Morris et al. 2012      | HNF1A         |
| TYPE 2 DIABETES | rs12571751 | A | G | 0.076961041 | Morris et al. 2012      | ZMIZ1         |
| TYPE 2 DIABETES | rs12899811 | G | A | 0.076961041 | Morris et al. 2012      | PRC1          |
| TYPE 2 DIABETES | rs12970134 | A | G | 0.076961041 | Morris et al. 2012      | MC4R          |
| TYPE 2 DIABETES | rs13389219 | C | T | 0.067658648 | Morris et al. 2012      | GRB14         |
| TYPE 2 DIABETES | rs1359790  | G | A | 0.076961041 | Morris et al. 2012      | SPRY2         |
| TYPE 2 DIABETES | rs1496653  | A | G | 0.086177696 | Morris et al. 2012      | UBE2E2        |
| TYPE 2 DIABETES | rs1552224  | A | C | 0.104360015 | Morris et al. 2012      | ARAP1         |
| TYPE 2 DIABETES | rs163184   | G | T | 0.086177696 | Morris et al. 2012      | KCNQ1         |
| TYPE 2 DIABETES | rs17168486 | T | C | 0.104360015 | Morris et al. 2012      | DGKB          |



## SUPPLEMENTARY DATA

|                                   |            |   |      |             |                             |               |
|-----------------------------------|------------|---|------|-------------|-----------------------------|---------------|
| TYPE 2 DIABETES                   | rs17791513 | A | G    | 0.113328685 | Morris et al. 2012          | TLE4          |
| TYPE 2 DIABETES                   | rs1801282  | C | G    | 0.122217633 | Morris et al. 2012          | PPARG         |
| TYPE 2 DIABETES                   | rs2075423  | G | T    | 0.067658648 | Morris et al. 2012          | PROX1         |
| TYPE 2 DIABETES                   | rs2261181  | T | C    | 0.122217633 | Morris et al. 2012          | HMG2          |
| TYPE 2 DIABETES                   | rs243088   | T | A    | 0.067658648 | Morris et al. 2012          | BCL11A        |
| TYPE 2 DIABETES                   | rs2796441  | G | A    | 0.067658648 | Morris et al. 2012          | TLE1          |
| TYPE 2 DIABETES                   | rs2943640  | C | A    | 0.09531018  | Morris et al. 2012          | IRS1          |
| TYPE 2 DIABETES                   | rs3802177  | G | A    | 0.131028262 | Morris et al. 2012          | SLC30A8       |
| TYPE 2 DIABETES                   | rs4402960  | T | G    | 0.122217633 | Morris et al. 2012          | IGF2BP2       |
| TYPE 2 DIABETES                   | rs4458523  | G | T    | 0.09531018  | Morris et al. 2012          | WFS1          |
| TYPE 2 DIABETES                   | rs4502156  | T | C    | 0.058268908 | Morris et al. 2012          | C2CD4A        |
| TYPE 2 DIABETES                   | rs459193   | G | A    | 0.076961041 | Morris et al. 2012          | ANKRD55       |
| TYPE 2 DIABETES                   | rs516946   | C | T    | 0.086177696 | Morris et al. 2012          | ANK1          |
| TYPE 2 DIABETES                   | rs5215     | C | T    | 0.067658648 | Morris et al. 2012          | KCNJ11        |
| TYPE 2 DIABETES                   | rs6795735  | C | T    | 0.076961041 | Morris et al. 2012          | ADAMTS9       |
| TYPE 2 DIABETES                   | rs6878122  | G | A    | 0.09531018  | Morris et al. 2012          | ZBED3         |
| TYPE 2 DIABETES                   | rs7177055  | A | G    | 0.076961041 | Morris et al. 2012          | HMG20A        |
| TYPE 2 DIABETES                   | rs7202877  | T | G    | 0.113328685 | Morris et al. 2012          | BCAR1         |
| TYPE 2 DIABETES                   | rs7756992  | G | A    | 0.157003749 | Morris et al. 2012          | CDKAL1        |
| TYPE 2 DIABETES                   | rs7845219  | T | C    | 0.058268908 | Morris et al. 2012          | TP53INP1      |
| TYPE 2 DIABETES                   | rs7903146  | T | C    | 0.329303747 | Morris et al. 2012          | TCF7L2        |
| TYPE 2 DIABETES                   | rs7955901  | C | T    | 0.067658648 | Morris et al. 2012          | TSPAN8, LGR5  |
| TYPE 2 DIABETES                   | rs8108269  | G | T    | 0.067658648 | Morris et al. 2012          | GIPR          |
| TYPE 2 DIABETES                   | rs849135   | G | A    | 0.104360015 | Morris et al. 2012          | JAZF1         |
| TYPE 2 DIABETES                   | rs9936385  | C | T    | 0.122217633 | Morris et al. 2012          | FTO           |
| TYPE 2 DIABETES                   | rs2334499  | T | C    | 0.039220713 | PMID: 20016592              |               |
| TYPE 2 DIABETES                   | rs7593730  | C | T    | 0.104360015 | Qi et al. 2010              | RBMS1/ITGB6   |
| TYPE 2 DIABETES                   | rs76895963 | T | G    | 0.634878032 | Steinhorsdottir et al. 2014 | CCND2         |
| TYPE 2 DIABETES                   | rs16927668 | T | C    | 0.039220713 | Tsai et al. 2010            | PTPRD         |
| TYPE 2 DIABETES                   | rs2447090  | A | G    | 0.039220713 | Tsai et al. 2010            | MNT           |
| TYPE 2 DIABETES                   | rs13233731 | G | A    | 0.048790164 | Voight et al. 2010          | KLF14         |
| WAIST HIP RATIO (ADJUSTED BY BMI) | rs10049088 | C | miss | 0.029       | Pulit et al. 2019           | Not available |
| WAIST HIP RATIO (ADJUSTED BY BMI) | rs10054063 | T | miss | 0.027       | Pulit et al. 2019           | Not available |
| WAIST HIP RATIO (ADJUSTED BY BMI) | rs10055995 | C | miss | 0.011       | Pulit et al. 2019           | Not available |
| WAIST HIP RATIO (ADJUSTED BY BMI) | rs10100423 | T | miss | 0.042       | Pulit et al. 2019           | Not available |
| WAIST HIP RATIO (ADJUSTED BY BMI) | rs10100533 | A | miss | 0.014       | Pulit et al. 2019           | Not available |
| WAIST HIP RATIO (ADJUSTED BY BMI) | rs10249651 | C | miss | 0.015       | Pulit et al. 2019           | Not available |
| WAIST HIP RATIO (ADJUSTED BY BMI) | rs1029472  | G | miss | 0.025       | Pulit et al. 2019           | Not available |
| WAIST HIP RATIO (ADJUSTED BY BMI) | rs1029645  | G | miss | 0.013       | Pulit et al. 2019           | Not available |
| WAIST HIP RATIO (ADJUSTED BY BMI) | rs1035942  | A | miss | 0.014       | Pulit et al. 2019           | Not available |
| WAIST HIP RATIO (ADJUSTED BY BMI) | rs1045241  | C | miss | 0.019       | Pulit et al. 2019           | Not available |

## SUPPLEMENTARY DATA

|                                   |             |   |      |       |                   |               |
|-----------------------------------|-------------|---|------|-------|-------------------|---------------|
| WAIST HIP RATIO (ADJUSTED BY BMI) | rs10462028  | A | miss | 0.019 | Pulit et al. 2019 | Not available |
| WAIST HIP RATIO (ADJUSTED BY BMI) | rs10463416  | A | miss | 0.014 | Pulit et al. 2019 | Not available |
| WAIST HIP RATIO (ADJUSTED BY BMI) | rs10502148  | C | miss | 0.023 | Pulit et al. 2019 | Not available |
| WAIST HIP RATIO (ADJUSTED BY BMI) | rs10507524  | C | miss | 0.018 | Pulit et al. 2019 | Not available |
| WAIST HIP RATIO (ADJUSTED BY BMI) | rs1051684   | A | miss | 0.013 | Pulit et al. 2019 | Not available |
| WAIST HIP RATIO (ADJUSTED BY BMI) | rs1057119   | C | miss | 0.013 | Pulit et al. 2019 | Not available |
| WAIST HIP RATIO (ADJUSTED BY BMI) | rs10745659  | G | miss | 0.013 | Pulit et al. 2019 | Not available |
| WAIST HIP RATIO (ADJUSTED BY BMI) | rs10778504  | T | miss | 0.016 | Pulit et al. 2019 | Not available |
| WAIST HIP RATIO (ADJUSTED BY BMI) | rs10799424  | T | miss | 0.013 | Pulit et al. 2019 | Not available |
| WAIST HIP RATIO (ADJUSTED BY BMI) | rs10808546  | C | miss | 0.016 | Pulit et al. 2019 | Not available |
| WAIST HIP RATIO (ADJUSTED BY BMI) | rs10817896  | T | miss | 0.013 | Pulit et al. 2019 | Not available |
| WAIST HIP RATIO (ADJUSTED BY BMI) | rs10820747  | A | miss | 0.027 | Pulit et al. 2019 | Not available |
| WAIST HIP RATIO (ADJUSTED BY BMI) | rs10827226  | T | miss | 0.02  | Pulit et al. 2019 | Not available |
| WAIST HIP RATIO (ADJUSTED BY BMI) | rs10842707  | T | miss | 0.034 | Pulit et al. 2019 | Not available |
| WAIST HIP RATIO (ADJUSTED BY BMI) | rs10843804  | T | miss | 0.015 | Pulit et al. 2019 | Not available |
| WAIST HIP RATIO (ADJUSTED BY BMI) | rs10878367  | A | miss | 0.019 | Pulit et al. 2019 | Not available |
| WAIST HIP RATIO (ADJUSTED BY BMI) | rs10880823  | C | miss | 0.013 | Pulit et al. 2019 | Not available |
| WAIST HIP RATIO (ADJUSTED BY BMI) | rs10887759  | A | miss | 0.017 | Pulit et al. 2019 | Not available |
| WAIST HIP RATIO (ADJUSTED BY BMI) | rs10913257  | G | miss | 0.011 | Pulit et al. 2019 | Not available |
| WAIST HIP RATIO (ADJUSTED BY BMI) | rs10919388  | C | miss | 0.033 | Pulit et al. 2019 | Not available |
| WAIST HIP RATIO (ADJUSTED BY BMI) | rs10923724  | T | miss | 0.035 | Pulit et al. 2019 | Not available |
| WAIST HIP RATIO (ADJUSTED BY BMI) | rs10963067  | C | miss | 0.021 | Pulit et al. 2019 | Not available |
| WAIST HIP RATIO (ADJUSTED BY BMI) | rs10980797  | G | miss | 0.018 | Pulit et al. 2019 | Not available |
| WAIST HIP RATIO (ADJUSTED BY BMI) | rs11042077  | A | miss | 0.012 | Pulit et al. 2019 | Not available |
| WAIST HIP RATIO (ADJUSTED BY BMI) | rs1105881   | G | miss | 0.016 | Pulit et al. 2019 | Not available |
| WAIST HIP RATIO (ADJUSTED BY BMI) | rs11074934  | T | miss | 0.012 | Pulit et al. 2019 | Not available |
| WAIST HIP RATIO (ADJUSTED BY BMI) | rs11078594  | G | miss | 0.015 | Pulit et al. 2019 | Not available |
| WAIST HIP RATIO (ADJUSTED BY BMI) | rs11082430  | C | miss | 0.013 | Pulit et al. 2019 | Not available |
| WAIST HIP RATIO (ADJUSTED BY BMI) | rs11085744  | T | miss | 0.011 | Pulit et al. 2019 | Not available |
| WAIST HIP RATIO (ADJUSTED BY BMI) | rs11088991  | T | miss | 0.013 | Pulit et al. 2019 | Not available |
| WAIST HIP RATIO (ADJUSTED BY BMI) | rs1111875   | C | miss | 0.011 | Pulit et al. 2019 | Not available |
| WAIST HIP RATIO (ADJUSTED BY BMI) | rs11129657  | C | miss | 0.015 | Pulit et al. 2019 | Not available |
| WAIST HIP RATIO (ADJUSTED BY BMI) | rs11134029  | T | miss | 0.014 | Pulit et al. 2019 | Not available |
| WAIST HIP RATIO (ADJUSTED BY BMI) | rs11187537  | C | miss | 0.016 | Pulit et al. 2019 | Not available |
| WAIST HIP RATIO (ADJUSTED BY BMI) | rs11204762  | A | miss | 0.014 | Pulit et al. 2019 | Not available |
| WAIST HIP RATIO (ADJUSTED BY BMI) | rs11205773  | T | miss | 0.019 | Pulit et al. 2019 | Not available |
| WAIST HIP RATIO (ADJUSTED BY BMI) | rs11235     | C | miss | 0.022 | Pulit et al. 2019 | Not available |
| WAIST HIP RATIO (ADJUSTED BY BMI) | rs112907088 | G | miss | 0.041 | Pulit et al. 2019 | Not available |
| WAIST HIP RATIO (ADJUSTED BY BMI) | rs1139653   | A | miss | 0.018 | Pulit et al. 2019 | Not available |
| WAIST HIP RATIO (ADJUSTED BY BMI) | rs1144      | C | miss | 0.015 | Pulit et al. 2019 | Not available |
| WAIST HIP RATIO (ADJUSTED BY BMI) | rs114760566 | A | miss | 0.093 | Pulit et al. 2019 | Not available |

## SUPPLEMENTARY DATA

|                                   |            |   |      |       |                   |               |
|-----------------------------------|------------|---|------|-------|-------------------|---------------|
| WAIST HIP RATIO (ADJUSTED BY BMI) | rs11574514 | C | miss | 0.029 | Pulit et al. 2019 | Not available |
| WAIST HIP RATIO (ADJUSTED BY BMI) | rs11592754 | C | miss | 0.022 | Pulit et al. 2019 | Not available |
| WAIST HIP RATIO (ADJUSTED BY BMI) | rs11670056 | C | miss | 0.024 | Pulit et al. 2019 | Not available |
| WAIST HIP RATIO (ADJUSTED BY BMI) | rs11722554 | G | miss | 0.033 | Pulit et al. 2019 | Not available |
| WAIST HIP RATIO (ADJUSTED BY BMI) | rs11724804 | G | miss | 0.017 | Pulit et al. 2019 | Not available |
| WAIST HIP RATIO (ADJUSTED BY BMI) | rs11746028 | C | miss | 0.014 | Pulit et al. 2019 | Not available |
| WAIST HIP RATIO (ADJUSTED BY BMI) | rs11747001 | A | miss | 0.017 | Pulit et al. 2019 | Not available |
| WAIST HIP RATIO (ADJUSTED BY BMI) | rs11757455 | G | miss | 0.022 | Pulit et al. 2019 | Not available |
| WAIST HIP RATIO (ADJUSTED BY BMI) | rs11770285 | C | miss | 0.031 | Pulit et al. 2019 | Not available |
| WAIST HIP RATIO (ADJUSTED BY BMI) | rs11786566 | G | miss | 0.011 | Pulit et al. 2019 | Not available |
| WAIST HIP RATIO (ADJUSTED BY BMI) | rs11897119 | C | miss | 0.014 | Pulit et al. 2019 | Not available |
| WAIST HIP RATIO (ADJUSTED BY BMI) | rs1190982  | T | miss | 0.016 | Pulit et al. 2019 | Not available |
| WAIST HIP RATIO (ADJUSTED BY BMI) | rs12138803 | T | miss | 0.025 | Pulit et al. 2019 | Not available |
| WAIST HIP RATIO (ADJUSTED BY BMI) | rs1223581  | T | miss | 0.011 | Pulit et al. 2019 | Not available |
| WAIST HIP RATIO (ADJUSTED BY BMI) | rs12325187 | C | miss | 0.013 | Pulit et al. 2019 | Not available |
| WAIST HIP RATIO (ADJUSTED BY BMI) | rs12419064 | G | miss | 0.014 | Pulit et al. 2019 | Not available |
| WAIST HIP RATIO (ADJUSTED BY BMI) | rs12435790 | A | miss | 0.021 | Pulit et al. 2019 | Not available |
| WAIST HIP RATIO (ADJUSTED BY BMI) | rs12441543 | G | miss | 0.019 | Pulit et al. 2019 | Not available |
| WAIST HIP RATIO (ADJUSTED BY BMI) | rs12442323 | C | miss | 0.015 | Pulit et al. 2019 | Not available |
| WAIST HIP RATIO (ADJUSTED BY BMI) | rs12454712 | T | miss | 0.017 | Pulit et al. 2019 | Not available |
| WAIST HIP RATIO (ADJUSTED BY BMI) | rs12459350 | A | miss | 0.014 | Pulit et al. 2019 | Not available |
| WAIST HIP RATIO (ADJUSTED BY BMI) | rs12494105 | G | miss | 0.012 | Pulit et al. 2019 | Not available |
| WAIST HIP RATIO (ADJUSTED BY BMI) | rs1250259  | T | miss | 0.016 | Pulit et al. 2019 | Not available |
| WAIST HIP RATIO (ADJUSTED BY BMI) | rs12527712 | T | miss | 0.034 | Pulit et al. 2019 | Not available |
| WAIST HIP RATIO (ADJUSTED BY BMI) | rs12543555 | G | miss | 0.014 | Pulit et al. 2019 | Not available |
| WAIST HIP RATIO (ADJUSTED BY BMI) | rs12608426 | A | miss | 0.025 | Pulit et al. 2019 | Not available |
| WAIST HIP RATIO (ADJUSTED BY BMI) | rs12608504 | A | miss | 0.026 | Pulit et al. 2019 | Not available |
| WAIST HIP RATIO (ADJUSTED BY BMI) | rs12684047 | T | miss | 0.015 | Pulit et al. 2019 | Not available |
| WAIST HIP RATIO (ADJUSTED BY BMI) | rs12686771 | T | miss | 0.022 | Pulit et al. 2019 | Not available |
| WAIST HIP RATIO (ADJUSTED BY BMI) | rs12692387 | C | miss | 0.013 | Pulit et al. 2019 | Not available |
| WAIST HIP RATIO (ADJUSTED BY BMI) | rs12694042 | T | miss | 0.012 | Pulit et al. 2019 | Not available |
| WAIST HIP RATIO (ADJUSTED BY BMI) | rs12774134 | C | miss | 0.019 | Pulit et al. 2019 | Not available |
| WAIST HIP RATIO (ADJUSTED BY BMI) | rs12823266 | A | miss | 0.013 | Pulit et al. 2019 | Not available |
| WAIST HIP RATIO (ADJUSTED BY BMI) | rs12828318 | A | miss | 0.017 | Pulit et al. 2019 | Not available |
| WAIST HIP RATIO (ADJUSTED BY BMI) | rs1294432  | T | miss | 0.025 | Pulit et al. 2019 | Not available |
| WAIST HIP RATIO (ADJUSTED BY BMI) | rs13010546 | T | miss | 0.014 | Pulit et al. 2019 | Not available |
| WAIST HIP RATIO (ADJUSTED BY BMI) | rs13107325 | C | miss | 0.031 | Pulit et al. 2019 | Not available |
| WAIST HIP RATIO (ADJUSTED BY BMI) | rs13137905 | T | miss | 0.013 | Pulit et al. 2019 | Not available |
| WAIST HIP RATIO (ADJUSTED BY BMI) | rs13198178 | C | miss | 0.031 | Pulit et al. 2019 | Not available |
| WAIST HIP RATIO (ADJUSTED BY BMI) | rs13223034 | C | miss | 0.013 | Pulit et al. 2019 | Not available |
| WAIST HIP RATIO (ADJUSTED BY BMI) | rs13234914 | G | miss | 0.013 | Pulit et al. 2019 | Not available |

## SUPPLEMENTARY DATA

|                                   |             |   |      |       |                   |               |
|-----------------------------------|-------------|---|------|-------|-------------------|---------------|
| WAIST HIP RATIO (ADJUSTED BY BMI) | rs13256367  | A | miss | 0.018 | Pulit et al. 2019 | Not available |
| WAIST HIP RATIO (ADJUSTED BY BMI) | rs1328757   | T | miss | 0.014 | Pulit et al. 2019 | Not available |
| WAIST HIP RATIO (ADJUSTED BY BMI) | rs1334576   | G | miss | 0.017 | Pulit et al. 2019 | Not available |
| WAIST HIP RATIO (ADJUSTED BY BMI) | rs13379794  | A | miss | 0.011 | Pulit et al. 2019 | Not available |
| WAIST HIP RATIO (ADJUSTED BY BMI) | rs1345203   | T | miss | 0.026 | Pulit et al. 2019 | Not available |
| WAIST HIP RATIO (ADJUSTED BY BMI) | rs1364422   | T | miss | 0.016 | Pulit et al. 2019 | Not available |
| WAIST HIP RATIO (ADJUSTED BY BMI) | rs1385167   | G | miss | 0.027 | Pulit et al. 2019 | Not available |
| WAIST HIP RATIO (ADJUSTED BY BMI) | rs139271800 | A | miss | 0.239 | Pulit et al. 2019 | Not available |
| WAIST HIP RATIO (ADJUSTED BY BMI) | rs140201358 | G | miss | 0.085 | Pulit et al. 2019 | Not available |
| WAIST HIP RATIO (ADJUSTED BY BMI) | rs1406948   | G | miss | 0.016 | Pulit et al. 2019 | Not available |
| WAIST HIP RATIO (ADJUSTED BY BMI) | rs144033177 | C | miss | 0.053 | Pulit et al. 2019 | Not available |
| WAIST HIP RATIO (ADJUSTED BY BMI) | rs1440372   | C | miss | 0.016 | Pulit et al. 2019 | Not available |
| WAIST HIP RATIO (ADJUSTED BY BMI) | rs144926207 | T | miss | 0.032 | Pulit et al. 2019 | Not available |
| WAIST HIP RATIO (ADJUSTED BY BMI) | rs145878042 | A | miss | 0.081 | Pulit et al. 2019 | Not available |
| WAIST HIP RATIO (ADJUSTED BY BMI) | rs146182298 | T | miss | 0.031 | Pulit et al. 2019 | Not available |
| WAIST HIP RATIO (ADJUSTED BY BMI) | rs1481801   | A | miss | 0.012 | Pulit et al. 2019 | Not available |
| WAIST HIP RATIO (ADJUSTED BY BMI) | rs1485745   | T | miss | 0.012 | Pulit et al. 2019 | Not available |
| WAIST HIP RATIO (ADJUSTED BY BMI) | rs1494204   | C | miss | 0.015 | Pulit et al. 2019 | Not available |
| WAIST HIP RATIO (ADJUSTED BY BMI) | rs149921263 | A | miss | 0.04  | Pulit et al. 2019 | Not available |
| WAIST HIP RATIO (ADJUSTED BY BMI) | rs150841499 | C | miss | 0.02  | Pulit et al. 2019 | Not available |
| WAIST HIP RATIO (ADJUSTED BY BMI) | rs1511022   | T | miss | 0.017 | Pulit et al. 2019 | Not available |
| WAIST HIP RATIO (ADJUSTED BY BMI) | rs1522811   | C | miss | 0.013 | Pulit et al. 2019 | Not available |
| WAIST HIP RATIO (ADJUSTED BY BMI) | rs1541681   | G | miss | 0.012 | Pulit et al. 2019 | Not available |
| WAIST HIP RATIO (ADJUSTED BY BMI) | rs1561      | T | miss | 0.022 | Pulit et al. 2019 | Not available |
| WAIST HIP RATIO (ADJUSTED BY BMI) | rs1569135   | A | miss | 0.021 | Pulit et al. 2019 | Not available |
| WAIST HIP RATIO (ADJUSTED BY BMI) | rs1635853   | T | miss | 0.016 | Pulit et al. 2019 | Not available |
| WAIST HIP RATIO (ADJUSTED BY BMI) | rs16907277  | G | miss | 0.023 | Pulit et al. 2019 | Not available |
| WAIST HIP RATIO (ADJUSTED BY BMI) | rs16976826  | T | miss | 0.02  | Pulit et al. 2019 | Not available |
| WAIST HIP RATIO (ADJUSTED BY BMI) | rs16978854  | G | miss | 0.033 | Pulit et al. 2019 | Not available |
| WAIST HIP RATIO (ADJUSTED BY BMI) | rs17067999  | C | miss | 0.016 | Pulit et al. 2019 | Not available |
| WAIST HIP RATIO (ADJUSTED BY BMI) | rs17101456  | G | miss | 0.025 | Pulit et al. 2019 | Not available |
| WAIST HIP RATIO (ADJUSTED BY BMI) | rs17154889  | C | miss | 0.016 | Pulit et al. 2019 | Not available |
| WAIST HIP RATIO (ADJUSTED BY BMI) | rs17289035  | A | miss | 0.014 | Pulit et al. 2019 | Not available |
| WAIST HIP RATIO (ADJUSTED BY BMI) | rs17311057  | T | miss | 0.015 | Pulit et al. 2019 | Not available |
| WAIST HIP RATIO (ADJUSTED BY BMI) | rs17326656  | T | miss | 0.015 | Pulit et al. 2019 | Not available |
| WAIST HIP RATIO (ADJUSTED BY BMI) | rs17369710  | C | miss | 0.012 | Pulit et al. 2019 | Not available |
| WAIST HIP RATIO (ADJUSTED BY BMI) | rs17417407  | T | miss | 0.014 | Pulit et al. 2019 | Not available |
| WAIST HIP RATIO (ADJUSTED BY BMI) | rs174829    | G | miss | 0.014 | Pulit et al. 2019 | Not available |
| WAIST HIP RATIO (ADJUSTED BY BMI) | rs17509001  | C | miss | 0.016 | Pulit et al. 2019 | Not available |
| WAIST HIP RATIO (ADJUSTED BY BMI) | rs17511102  | T | miss | 0.02  | Pulit et al. 2019 | Not available |
| WAIST HIP RATIO (ADJUSTED BY BMI) | rs1757471   | T | miss | 0.015 | Pulit et al. 2019 | Not available |

## SUPPLEMENTARY DATA

|                                   |             |   |      |       |                   |               |
|-----------------------------------|-------------|---|------|-------|-------------------|---------------|
| WAIST HIP RATIO (ADJUSTED BY BMI) | rs17703354  | C | miss | 0.02  | Pulit et al. 2019 | Not available |
| WAIST HIP RATIO (ADJUSTED BY BMI) | rs17703883  | C | miss | 0.015 | Pulit et al. 2019 | Not available |
| WAIST HIP RATIO (ADJUSTED BY BMI) | rs17764730  | C | miss | 0.016 | Pulit et al. 2019 | Not available |
| WAIST HIP RATIO (ADJUSTED BY BMI) | rs1800978   | C | miss | 0.026 | Pulit et al. 2019 | Not available |
| WAIST HIP RATIO (ADJUSTED BY BMI) | rs1805740   | G | miss | 0.018 | Pulit et al. 2019 | Not available |
| WAIST HIP RATIO (ADJUSTED BY BMI) | rs180958337 | T | miss | 0.088 | Pulit et al. 2019 | Not available |
| WAIST HIP RATIO (ADJUSTED BY BMI) | rs1893781   | A | miss | 0.018 | Pulit et al. 2019 | Not available |
| WAIST HIP RATIO (ADJUSTED BY BMI) | rs1979527   | A | miss | 0.013 | Pulit et al. 2019 | Not available |
| WAIST HIP RATIO (ADJUSTED BY BMI) | rs1997833   | C | miss | 0.014 | Pulit et al. 2019 | Not available |
| WAIST HIP RATIO (ADJUSTED BY BMI) | rs2012485   | C | miss | 0.029 | Pulit et al. 2019 | Not available |
| WAIST HIP RATIO (ADJUSTED BY BMI) | rs2027982   | C | miss | 0.012 | Pulit et al. 2019 | Not available |
| WAIST HIP RATIO (ADJUSTED BY BMI) | rs2028386   | G | miss | 0.013 | Pulit et al. 2019 | Not available |
| WAIST HIP RATIO (ADJUSTED BY BMI) | rs2047937   | C | miss | 0.015 | Pulit et al. 2019 | Not available |
| WAIST HIP RATIO (ADJUSTED BY BMI) | rs2061708   | C | miss | 0.016 | Pulit et al. 2019 | Not available |
| WAIST HIP RATIO (ADJUSTED BY BMI) | rs2075665   | A | miss | 0.011 | Pulit et al. 2019 | Not available |
| WAIST HIP RATIO (ADJUSTED BY BMI) | rs2124307   | C | miss | 0.013 | Pulit et al. 2019 | Not available |
| WAIST HIP RATIO (ADJUSTED BY BMI) | rs2145272   | G | miss | 0.025 | Pulit et al. 2019 | Not available |
| WAIST HIP RATIO (ADJUSTED BY BMI) | rs2158828   | G | miss | 0.014 | Pulit et al. 2019 | Not available |
| WAIST HIP RATIO (ADJUSTED BY BMI) | rs2167750   | T | miss | 0.027 | Pulit et al. 2019 | Not available |
| WAIST HIP RATIO (ADJUSTED BY BMI) | rs2200155   | G | miss | 0.014 | Pulit et al. 2019 | Not available |
| WAIST HIP RATIO (ADJUSTED BY BMI) | rs2222543   | G | miss | 0.015 | Pulit et al. 2019 | Not available |
| WAIST HIP RATIO (ADJUSTED BY BMI) | rs2236519   | A | miss | 0.03  | Pulit et al. 2019 | Not available |
| WAIST HIP RATIO (ADJUSTED BY BMI) | rs2272790   | G | miss | 0.013 | Pulit et al. 2019 | Not available |
| WAIST HIP RATIO (ADJUSTED BY BMI) | rs2277339   | G | miss | 0.022 | Pulit et al. 2019 | Not available |
| WAIST HIP RATIO (ADJUSTED BY BMI) | rs227733    | A | miss | 0.013 | Pulit et al. 2019 | Not available |
| WAIST HIP RATIO (ADJUSTED BY BMI) | rs2279469   | C | miss | 0.013 | Pulit et al. 2019 | Not available |
| WAIST HIP RATIO (ADJUSTED BY BMI) | rs2294239   | A | miss | 0.024 | Pulit et al. 2019 | Not available |
| WAIST HIP RATIO (ADJUSTED BY BMI) | rs2294823   | T | miss | 0.012 | Pulit et al. 2019 | Not available |
| WAIST HIP RATIO (ADJUSTED BY BMI) | rs2299253   | T | miss | 0.012 | Pulit et al. 2019 | Not available |
| WAIST HIP RATIO (ADJUSTED BY BMI) | rs2373078   | T | miss | 0.022 | Pulit et al. 2019 | Not available |
| WAIST HIP RATIO (ADJUSTED BY BMI) | rs2376585   | C | miss | 0.018 | Pulit et al. 2019 | Not available |
| WAIST HIP RATIO (ADJUSTED BY BMI) | rs2387280   | A | miss | 0.018 | Pulit et al. 2019 | Not available |
| WAIST HIP RATIO (ADJUSTED BY BMI) | rs2398893   | A | miss | 0.015 | Pulit et al. 2019 | Not available |
| WAIST HIP RATIO (ADJUSTED BY BMI) | rs2503100   | G | miss | 0.025 | Pulit et al. 2019 | Not available |
| WAIST HIP RATIO (ADJUSTED BY BMI) | rs2524163   | T | miss | 0.024 | Pulit et al. 2019 | Not available |
| WAIST HIP RATIO (ADJUSTED BY BMI) | rs2526886   | T | miss | 0.014 | Pulit et al. 2019 | Not available |
| WAIST HIP RATIO (ADJUSTED BY BMI) | rs2529411   | G | miss | 0.011 | Pulit et al. 2019 | Not available |
| WAIST HIP RATIO (ADJUSTED BY BMI) | rs2595004   | C | miss | 0.016 | Pulit et al. 2019 | Not available |
| WAIST HIP RATIO (ADJUSTED BY BMI) | rs2602680   | T | miss | 0.012 | Pulit et al. 2019 | Not available |
| WAIST HIP RATIO (ADJUSTED BY BMI) | rs2603229   | T | miss | 0.012 | Pulit et al. 2019 | Not available |
| WAIST HIP RATIO (ADJUSTED BY BMI) | rs2701523   | A | miss | 0.013 | Pulit et al. 2019 | Not available |

## SUPPLEMENTARY DATA

|                                   |            |   |      |       |                   |               |
|-----------------------------------|------------|---|------|-------|-------------------|---------------|
| WAIST HIP RATIO (ADJUSTED BY BMI) | rs270960   | A | miss | 0.011 | Pulit et al. 2019 | Not available |
| WAIST HIP RATIO (ADJUSTED BY BMI) | rs2786198  | A | miss | 0.013 | Pulit et al. 2019 | Not available |
| WAIST HIP RATIO (ADJUSTED BY BMI) | rs2791550  | G | miss | 0.037 | Pulit et al. 2019 | Not available |
| WAIST HIP RATIO (ADJUSTED BY BMI) | rs2836141  | T | miss | 0.015 | Pulit et al. 2019 | Not available |
| WAIST HIP RATIO (ADJUSTED BY BMI) | rs28408682 | G | miss | 0.012 | Pulit et al. 2019 | Not available |
| WAIST HIP RATIO (ADJUSTED BY BMI) | rs28451064 | A | miss | 0.018 | Pulit et al. 2019 | Not available |
| WAIST HIP RATIO (ADJUSTED BY BMI) | rs2898237  | A | miss | 0.012 | Pulit et al. 2019 | Not available |
| WAIST HIP RATIO (ADJUSTED BY BMI) | rs2925979  | T | miss | 0.027 | Pulit et al. 2019 | Not available |
| WAIST HIP RATIO (ADJUSTED BY BMI) | rs2970332  | A | miss | 0.016 | Pulit et al. 2019 | Not available |
| WAIST HIP RATIO (ADJUSTED BY BMI) | rs299615   | G | miss | 0.015 | Pulit et al. 2019 | Not available |
| WAIST HIP RATIO (ADJUSTED BY BMI) | rs2997447  | G | miss | 0.014 | Pulit et al. 2019 | Not available |
| WAIST HIP RATIO (ADJUSTED BY BMI) | rs3110697  | A | miss | 0.012 | Pulit et al. 2019 | Not available |
| WAIST HIP RATIO (ADJUSTED BY BMI) | rs3218121  | A | miss | 0.022 | Pulit et al. 2019 | Not available |
| WAIST HIP RATIO (ADJUSTED BY BMI) | rs322396   | A | miss | 0.012 | Pulit et al. 2019 | Not available |
| WAIST HIP RATIO (ADJUSTED BY BMI) | rs332105   | G | miss | 0.014 | Pulit et al. 2019 | Not available |
| WAIST HIP RATIO (ADJUSTED BY BMI) | rs34000    | T | miss | 0.014 | Pulit et al. 2019 | Not available |
| WAIST HIP RATIO (ADJUSTED BY BMI) | rs34312154 | A | miss | 0.019 | Pulit et al. 2019 | Not available |
| WAIST HIP RATIO (ADJUSTED BY BMI) | rs34905952 | A | miss | 0.021 | Pulit et al. 2019 | Not available |
| WAIST HIP RATIO (ADJUSTED BY BMI) | rs352300   | C | miss | 0.011 | Pulit et al. 2019 | Not available |
| WAIST HIP RATIO (ADJUSTED BY BMI) | rs35344256 | A | miss | 0.014 | Pulit et al. 2019 | Not available |
| WAIST HIP RATIO (ADJUSTED BY BMI) | rs35419826 | G | miss | 0.016 | Pulit et al. 2019 | Not available |
| WAIST HIP RATIO (ADJUSTED BY BMI) | rs35710478 | C | miss | 0.012 | Pulit et al. 2019 | Not available |
| WAIST HIP RATIO (ADJUSTED BY BMI) | rs357438   | G | miss | 0.011 | Pulit et al. 2019 | Not available |
| WAIST HIP RATIO (ADJUSTED BY BMI) | rs3731861  | C | miss | 0.011 | Pulit et al. 2019 | Not available |
| WAIST HIP RATIO (ADJUSTED BY BMI) | rs3741378  | C | miss | 0.022 | Pulit et al. 2019 | Not available |
| WAIST HIP RATIO (ADJUSTED BY BMI) | rs3757298  | C | miss | 0.021 | Pulit et al. 2019 | Not available |
| WAIST HIP RATIO (ADJUSTED BY BMI) | rs3761706  | A | miss | 0.032 | Pulit et al. 2019 | Not available |
| WAIST HIP RATIO (ADJUSTED BY BMI) | rs3786897  | G | miss | 0.028 | Pulit et al. 2019 | Not available |
| WAIST HIP RATIO (ADJUSTED BY BMI) | rs3792751  | T | miss | 0.014 | Pulit et al. 2019 | Not available |
| WAIST HIP RATIO (ADJUSTED BY BMI) | rs3803042  | A | miss | 0.027 | Pulit et al. 2019 | Not available |
| WAIST HIP RATIO (ADJUSTED BY BMI) | rs3807947  | T | miss | 0.014 | Pulit et al. 2019 | Not available |
| WAIST HIP RATIO (ADJUSTED BY BMI) | rs3851294  | G | miss | 0.026 | Pulit et al. 2019 | Not available |
| WAIST HIP RATIO (ADJUSTED BY BMI) | rs3936510  | T | miss | 0.03  | Pulit et al. 2019 | Not available |
| WAIST HIP RATIO (ADJUSTED BY BMI) | rs402294   | A | miss | 0.014 | Pulit et al. 2019 | Not available |
| WAIST HIP RATIO (ADJUSTED BY BMI) | rs41277978 | A | miss | 0.073 | Pulit et al. 2019 | Not available |
| WAIST HIP RATIO (ADJUSTED BY BMI) | rs4293945  | A | miss | 0.012 | Pulit et al. 2019 | Not available |
| WAIST HIP RATIO (ADJUSTED BY BMI) | rs4371408  | A | miss | 0.016 | Pulit et al. 2019 | Not available |
| WAIST HIP RATIO (ADJUSTED BY BMI) | rs4372913  | G | miss | 0.016 | Pulit et al. 2019 | Not available |
| WAIST HIP RATIO (ADJUSTED BY BMI) | rs4420638  | A | miss | 0.023 | Pulit et al. 2019 | Not available |
| WAIST HIP RATIO (ADJUSTED BY BMI) | rs4474021  | T | miss | 0.012 | Pulit et al. 2019 | Not available |
| WAIST HIP RATIO (ADJUSTED BY BMI) | rs4489410  | C | miss | 0.012 | Pulit et al. 2019 | Not available |

## SUPPLEMENTARY DATA

|                                   |            |   |      |       |                   |               |
|-----------------------------------|------------|---|------|-------|-------------------|---------------|
| WAIST HIP RATIO (ADJUSTED BY BMI) | rs4558863  | C | miss | 0.021 | Pulit et al. 2019 | Not available |
| WAIST HIP RATIO (ADJUSTED BY BMI) | rs4646342  | G | miss | 0.017 | Pulit et al. 2019 | Not available |
| WAIST HIP RATIO (ADJUSTED BY BMI) | rs4684857  | C | miss | 0.021 | Pulit et al. 2019 | Not available |
| WAIST HIP RATIO (ADJUSTED BY BMI) | rs4686696  | A | miss | 0.015 | Pulit et al. 2019 | Not available |
| WAIST HIP RATIO (ADJUSTED BY BMI) | rs4773173  | A | miss | 0.015 | Pulit et al. 2019 | Not available |
| WAIST HIP RATIO (ADJUSTED BY BMI) | rs4789261  | C | miss | 0.029 | Pulit et al. 2019 | Not available |
| WAIST HIP RATIO (ADJUSTED BY BMI) | rs4794033  | G | miss | 0.019 | Pulit et al. 2019 | Not available |
| WAIST HIP RATIO (ADJUSTED BY BMI) | rs4902630  | A | miss | 0.012 | Pulit et al. 2019 | Not available |
| WAIST HIP RATIO (ADJUSTED BY BMI) | rs4951588  | C | miss | 0.012 | Pulit et al. 2019 | Not available |
| WAIST HIP RATIO (ADJUSTED BY BMI) | rs4964058  | A | miss | 0.011 | Pulit et al. 2019 | Not available |
| WAIST HIP RATIO (ADJUSTED BY BMI) | rs4964656  | G | miss | 0.016 | Pulit et al. 2019 | Not available |
| WAIST HIP RATIO (ADJUSTED BY BMI) | rs541091   | G | miss | 0.02  | Pulit et al. 2019 | Not available |
| WAIST HIP RATIO (ADJUSTED BY BMI) | rs55747707 | G | miss | 0.024 | Pulit et al. 2019 | Not available |
| WAIST HIP RATIO (ADJUSTED BY BMI) | rs55920843 | T | miss | 0.086 | Pulit et al. 2019 | Not available |
| WAIST HIP RATIO (ADJUSTED BY BMI) | rs56185013 | G | miss | 0.017 | Pulit et al. 2019 | Not available |
| WAIST HIP RATIO (ADJUSTED BY BMI) | rs56196860 | C | miss | 0.036 | Pulit et al. 2019 | Not available |
| WAIST HIP RATIO (ADJUSTED BY BMI) | rs56271783 | C | miss | 0.059 | Pulit et al. 2019 | Not available |
| WAIST HIP RATIO (ADJUSTED BY BMI) | rs598104   | T | miss | 0.014 | Pulit et al. 2019 | Not available |
| WAIST HIP RATIO (ADJUSTED BY BMI) | rs59888683 | T | miss | 0.014 | Pulit et al. 2019 | Not available |
| WAIST HIP RATIO (ADJUSTED BY BMI) | rs6018291  | G | miss | 0.014 | Pulit et al. 2019 | Not available |
| WAIST HIP RATIO (ADJUSTED BY BMI) | rs6040229  | G | miss | 0.011 | Pulit et al. 2019 | Not available |
| WAIST HIP RATIO (ADJUSTED BY BMI) | rs6047259  | T | miss | 0.01  | Pulit et al. 2019 | Not available |
| WAIST HIP RATIO (ADJUSTED BY BMI) | rs6054471  | T | miss | 0.012 | Pulit et al. 2019 | Not available |
| WAIST HIP RATIO (ADJUSTED BY BMI) | rs62012773 | G | miss | 0.017 | Pulit et al. 2019 | Not available |
| WAIST HIP RATIO (ADJUSTED BY BMI) | rs62070804 | T | miss | 0.047 | Pulit et al. 2019 | Not available |
| WAIST HIP RATIO (ADJUSTED BY BMI) | rs62271373 | A | miss | 0.041 | Pulit et al. 2019 | Not available |
| WAIST HIP RATIO (ADJUSTED BY BMI) | rs62621197 | C | miss | 0.036 | Pulit et al. 2019 | Not available |
| WAIST HIP RATIO (ADJUSTED BY BMI) | rs634869   | T | miss | 0.023 | Pulit et al. 2019 | Not available |
| WAIST HIP RATIO (ADJUSTED BY BMI) | rs6426912  | T | miss | 0.019 | Pulit et al. 2019 | Not available |
| WAIST HIP RATIO (ADJUSTED BY BMI) | rs6432188  | T | miss | 0.014 | Pulit et al. 2019 | Not available |
| WAIST HIP RATIO (ADJUSTED BY BMI) | rs6480914  | A | miss | 0.013 | Pulit et al. 2019 | Not available |
| WAIST HIP RATIO (ADJUSTED BY BMI) | rs6556301  | T | miss | 0.021 | Pulit et al. 2019 | Not available |
| WAIST HIP RATIO (ADJUSTED BY BMI) | rs664532   | T | miss | 0.013 | Pulit et al. 2019 | Not available |
| WAIST HIP RATIO (ADJUSTED BY BMI) | rs6658424  | T | miss | 0.014 | Pulit et al. 2019 | Not available |
| WAIST HIP RATIO (ADJUSTED BY BMI) | rs6688233  | T | miss | 0.021 | Pulit et al. 2019 | Not available |
| WAIST HIP RATIO (ADJUSTED BY BMI) | rs6705646  | A | miss | 0.025 | Pulit et al. 2019 | Not available |
| WAIST HIP RATIO (ADJUSTED BY BMI) | rs6721459  | G | miss | 0.018 | Pulit et al. 2019 | Not available |
| WAIST HIP RATIO (ADJUSTED BY BMI) | rs6752964  | C | miss | 0.019 | Pulit et al. 2019 | Not available |
| WAIST HIP RATIO (ADJUSTED BY BMI) | rs6795831  | A | miss | 0.035 | Pulit et al. 2019 | Not available |
| WAIST HIP RATIO (ADJUSTED BY BMI) | rs6853254  | T | miss | 0.017 | Pulit et al. 2019 | Not available |
| WAIST HIP RATIO (ADJUSTED BY BMI) | rs6859752  | T | miss | 0.012 | Pulit et al. 2019 | Not available |

## SUPPLEMENTARY DATA

|                                   |            |   |      |       |                   |               |
|-----------------------------------|------------|---|------|-------|-------------------|---------------|
| WAIST HIP RATIO (ADJUSTED BY BMI) | rs6867518  | C | miss | 0.018 | Pulit et al. 2019 | Not available |
| WAIST HIP RATIO (ADJUSTED BY BMI) | rs6872807  | T | miss | 0.011 | Pulit et al. 2019 | Not available |
| WAIST HIP RATIO (ADJUSTED BY BMI) | rs6905288  | A | miss | 0.044 | Pulit et al. 2019 | Not available |
| WAIST HIP RATIO (ADJUSTED BY BMI) | rs6932767  | T | miss | 0.015 | Pulit et al. 2019 | Not available |
| WAIST HIP RATIO (ADJUSTED BY BMI) | rs6940715  | A | miss | 0.022 | Pulit et al. 2019 | Not available |
| WAIST HIP RATIO (ADJUSTED BY BMI) | rs6985478  | A | miss | 0.015 | Pulit et al. 2019 | Not available |
| WAIST HIP RATIO (ADJUSTED BY BMI) | rs699370   | C | miss | 0.013 | Pulit et al. 2019 | Not available |
| WAIST HIP RATIO (ADJUSTED BY BMI) | rs7003062  | C | miss | 0.012 | Pulit et al. 2019 | Not available |
| WAIST HIP RATIO (ADJUSTED BY BMI) | rs7020604  | A | miss | 0.013 | Pulit et al. 2019 | Not available |
| WAIST HIP RATIO (ADJUSTED BY BMI) | rs7070749  | A | miss | 0.014 | Pulit et al. 2019 | Not available |
| WAIST HIP RATIO (ADJUSTED BY BMI) | rs7086377  | T | miss | 0.012 | Pulit et al. 2019 | Not available |
| WAIST HIP RATIO (ADJUSTED BY BMI) | rs7102     | C | miss | 0.012 | Pulit et al. 2019 | Not available |
| WAIST HIP RATIO (ADJUSTED BY BMI) | rs711076   | C | miss | 0.012 | Pulit et al. 2019 | Not available |
| WAIST HIP RATIO (ADJUSTED BY BMI) | rs711869   | G | miss | 0.019 | Pulit et al. 2019 | Not available |
| WAIST HIP RATIO (ADJUSTED BY BMI) | rs7119797  | C | miss | 0.013 | Pulit et al. 2019 | Not available |
| WAIST HIP RATIO (ADJUSTED BY BMI) | rs71439172 | G | miss | 0.023 | Pulit et al. 2019 | Not available |
| WAIST HIP RATIO (ADJUSTED BY BMI) | rs71511786 | A | miss | 0.023 | Pulit et al. 2019 | Not available |
| WAIST HIP RATIO (ADJUSTED BY BMI) | rs715300   | T | miss | 0.014 | Pulit et al. 2019 | Not available |
| WAIST HIP RATIO (ADJUSTED BY BMI) | rs717795   | C | miss | 0.02  | Pulit et al. 2019 | Not available |
| WAIST HIP RATIO (ADJUSTED BY BMI) | rs7198287  | C | miss | 0.014 | Pulit et al. 2019 | Not available |
| WAIST HIP RATIO (ADJUSTED BY BMI) | rs7213608  | C | miss | 0.012 | Pulit et al. 2019 | Not available |
| WAIST HIP RATIO (ADJUSTED BY BMI) | rs7225453  | C | miss | 0.015 | Pulit et al. 2019 | Not available |
| WAIST HIP RATIO (ADJUSTED BY BMI) | rs7235010  | A | miss | 0.019 | Pulit et al. 2019 | Not available |
| WAIST HIP RATIO (ADJUSTED BY BMI) | rs7252102  | G | miss | 0.014 | Pulit et al. 2019 | Not available |
| WAIST HIP RATIO (ADJUSTED BY BMI) | rs727428   | T | miss | 0.016 | Pulit et al. 2019 | Not available |
| WAIST HIP RATIO (ADJUSTED BY BMI) | rs7279347  | G | miss | 0.012 | Pulit et al. 2019 | Not available |
| WAIST HIP RATIO (ADJUSTED BY BMI) | rs72823057 | C | miss | 0.029 | Pulit et al. 2019 | Not available |
| WAIST HIP RATIO (ADJUSTED BY BMI) | rs72877579 | C | miss | 0.035 | Pulit et al. 2019 | Not available |
| WAIST HIP RATIO (ADJUSTED BY BMI) | rs72959041 | A | miss | 0.162 | Pulit et al. 2019 | Not available |
| WAIST HIP RATIO (ADJUSTED BY BMI) | rs73001065 | C | miss | 0.022 | Pulit et al. 2019 | Not available |
| WAIST HIP RATIO (ADJUSTED BY BMI) | rs73094710 | T | miss | 0.02  | Pulit et al. 2019 | Not available |
| WAIST HIP RATIO (ADJUSTED BY BMI) | rs7350438  | C | miss | 0.012 | Pulit et al. 2019 | Not available |
| WAIST HIP RATIO (ADJUSTED BY BMI) | rs73858966 | A | miss | 0.024 | Pulit et al. 2019 | Not available |
| WAIST HIP RATIO (ADJUSTED BY BMI) | rs73942938 | C | miss | 0.015 | Pulit et al. 2019 | Not available |
| WAIST HIP RATIO (ADJUSTED BY BMI) | rs7395513  | G | miss | 0.021 | Pulit et al. 2019 | Not available |
| WAIST HIP RATIO (ADJUSTED BY BMI) | rs740838   | C | miss | 0.043 | Pulit et al. 2019 | Not available |
| WAIST HIP RATIO (ADJUSTED BY BMI) | rs747249   | A | miss | 0.011 | Pulit et al. 2019 | Not available |
| WAIST HIP RATIO (ADJUSTED BY BMI) | rs7492628  | G | miss | 0.023 | Pulit et al. 2019 | Not available |
| WAIST HIP RATIO (ADJUSTED BY BMI) | rs7521902  | C | miss | 0.013 | Pulit et al. 2019 | Not available |
| WAIST HIP RATIO (ADJUSTED BY BMI) | rs7530102  | A | miss | 0.012 | Pulit et al. 2019 | Not available |
| WAIST HIP RATIO (ADJUSTED BY BMI) | rs7554947  | C | miss | 0.015 | Pulit et al. 2019 | Not available |



## SUPPLEMENTARY DATA

|                                   |            |   |      |       |                   |               |
|-----------------------------------|------------|---|------|-------|-------------------|---------------|
| WAIST HIP RATIO (ADJUSTED BY BMI) | rs755643   | G | miss | 0.012 | Pulit et al. 2019 | Not available |
| WAIST HIP RATIO (ADJUSTED BY BMI) | rs757081   | G | miss | 0.011 | Pulit et al. 2019 | Not available |
| WAIST HIP RATIO (ADJUSTED BY BMI) | rs757608   | A | miss | 0.019 | Pulit et al. 2019 | Not available |
| WAIST HIP RATIO (ADJUSTED BY BMI) | rs7585974  | C | miss | 0.019 | Pulit et al. 2019 | Not available |
| WAIST HIP RATIO (ADJUSTED BY BMI) | rs7680787  | T | miss | 0.014 | Pulit et al. 2019 | Not available |
| WAIST HIP RATIO (ADJUSTED BY BMI) | rs7708285  | G | miss | 0.013 | Pulit et al. 2019 | Not available |
| WAIST HIP RATIO (ADJUSTED BY BMI) | rs7721054  | T | miss | 0.017 | Pulit et al. 2019 | Not available |
| WAIST HIP RATIO (ADJUSTED BY BMI) | rs7744833  | A | miss | 0.012 | Pulit et al. 2019 | Not available |
| WAIST HIP RATIO (ADJUSTED BY BMI) | rs7795371  | A | miss | 0.017 | Pulit et al. 2019 | Not available |
| WAIST HIP RATIO (ADJUSTED BY BMI) | rs7798002  | T | miss | 0.032 | Pulit et al. 2019 | Not available |
| WAIST HIP RATIO (ADJUSTED BY BMI) | rs780159   | G | miss | 0.016 | Pulit et al. 2019 | Not available |
| WAIST HIP RATIO (ADJUSTED BY BMI) | rs7827182  | G | miss | 0.017 | Pulit et al. 2019 | Not available |
| WAIST HIP RATIO (ADJUSTED BY BMI) | rs7854560  | T | miss | 0.012 | Pulit et al. 2019 | Not available |
| WAIST HIP RATIO (ADJUSTED BY BMI) | rs7903146  | T | miss | 0.018 | Pulit et al. 2019 | Not available |
| WAIST HIP RATIO (ADJUSTED BY BMI) | rs7932891  | A | miss | 0.014 | Pulit et al. 2019 | Not available |
| WAIST HIP RATIO (ADJUSTED BY BMI) | rs7945962  | A | miss | 0.011 | Pulit et al. 2019 | Not available |
| WAIST HIP RATIO (ADJUSTED BY BMI) | rs79664277 | A | miss | 0.021 | Pulit et al. 2019 | Not available |
| WAIST HIP RATIO (ADJUSTED BY BMI) | rs797486   | A | miss | 0.037 | Pulit et al. 2019 | Not available |
| WAIST HIP RATIO (ADJUSTED BY BMI) | rs7993238  | C | miss | 0.012 | Pulit et al. 2019 | Not available |
| WAIST HIP RATIO (ADJUSTED BY BMI) | rs801593   | G | miss | 0.012 | Pulit et al. 2019 | Not available |
| WAIST HIP RATIO (ADJUSTED BY BMI) | rs8024294  | A | miss | 0.018 | Pulit et al. 2019 | Not available |
| WAIST HIP RATIO (ADJUSTED BY BMI) | rs8054299  | C | miss | 0.015 | Pulit et al. 2019 | Not available |
| WAIST HIP RATIO (ADJUSTED BY BMI) | rs805768   | T | miss | 0.018 | Pulit et al. 2019 | Not available |
| WAIST HIP RATIO (ADJUSTED BY BMI) | rs8066985  | A | miss | 0.023 | Pulit et al. 2019 | Not available |
| WAIST HIP RATIO (ADJUSTED BY BMI) | rs8074638  | A | miss | 0.016 | Pulit et al. 2019 | Not available |
| WAIST HIP RATIO (ADJUSTED BY BMI) | rs8080903  | C | miss | 0.015 | Pulit et al. 2019 | Not available |
| WAIST HIP RATIO (ADJUSTED BY BMI) | rs8103017  | G | miss | 0.02  | Pulit et al. 2019 | Not available |
| WAIST HIP RATIO (ADJUSTED BY BMI) | rs8126001  | C | miss | 0.016 | Pulit et al. 2019 | Not available |
| WAIST HIP RATIO (ADJUSTED BY BMI) | rs8142329  | G | miss | 0.017 | Pulit et al. 2019 | Not available |
| WAIST HIP RATIO (ADJUSTED BY BMI) | rs821100   | G | miss | 0.016 | Pulit et al. 2019 | Not available |
| WAIST HIP RATIO (ADJUSTED BY BMI) | rs848286   | T | miss | 0.012 | Pulit et al. 2019 | Not available |
| WAIST HIP RATIO (ADJUSTED BY BMI) | rs863750   | T | miss | 0.037 | Pulit et al. 2019 | Not available |
| WAIST HIP RATIO (ADJUSTED BY BMI) | rs889129   | T | miss | 0.02  | Pulit et al. 2019 | Not available |
| WAIST HIP RATIO (ADJUSTED BY BMI) | rs905938   | T | miss | 0.024 | Pulit et al. 2019 | Not available |
| WAIST HIP RATIO (ADJUSTED BY BMI) | rs910071   | C | miss | 0.017 | Pulit et al. 2019 | Not available |
| WAIST HIP RATIO (ADJUSTED BY BMI) | rs910382   | G | miss | 0.019 | Pulit et al. 2019 | Not available |
| WAIST HIP RATIO (ADJUSTED BY BMI) | rs917191   | C | miss | 0.014 | Pulit et al. 2019 | Not available |
| WAIST HIP RATIO (ADJUSTED BY BMI) | rs917681   | T | miss | 0.012 | Pulit et al. 2019 | Not available |
| WAIST HIP RATIO (ADJUSTED BY BMI) | rs930653   | A | miss | 0.011 | Pulit et al. 2019 | Not available |
| WAIST HIP RATIO (ADJUSTED BY BMI) | rs9341990  | A | miss | 0.015 | Pulit et al. 2019 | Not available |
| WAIST HIP RATIO (ADJUSTED BY BMI) | rs9388766  | C | miss | 0.017 | Pulit et al. 2019 | Not available |

## SUPPLEMENTARY DATA

|                                   |           |   |      |       |                   |               |
|-----------------------------------|-----------|---|------|-------|-------------------|---------------|
| WAIST HIP RATIO (ADJUSTED BY BMI) | rs9415106 | A | miss | 0.014 | Pulit et al. 2019 | Not available |
| WAIST HIP RATIO (ADJUSTED BY BMI) | rs9435732 | C | miss | 0.013 | Pulit et al. 2019 | Not available |
| WAIST HIP RATIO (ADJUSTED BY BMI) | rs951252  | G | miss | 0.019 | Pulit et al. 2019 | Not available |
| WAIST HIP RATIO (ADJUSTED BY BMI) | rs9644033 | A | miss | 0.022 | Pulit et al. 2019 | Not available |
| WAIST HIP RATIO (ADJUSTED BY BMI) | rs9647379 | G | miss | 0.015 | Pulit et al. 2019 | Not available |
| WAIST HIP RATIO (ADJUSTED BY BMI) | rs9678859 | A | miss | 0.019 | Pulit et al. 2019 | Not available |
| WAIST HIP RATIO (ADJUSTED BY BMI) | rs975385  | C | miss | 0.011 | Pulit et al. 2019 | Not available |
| WAIST HIP RATIO (ADJUSTED BY BMI) | rs9909443 | C | miss | 0.014 | Pulit et al. 2019 | Not available |

## SUPPLEMENTARY DATA

Supplementary Table 3. ACR results of meta analysis of multivariate Mendelian randomization results for lipids adjusted by other lipids' betas in UK Biobank and CKDGen and in the two studies individually. 95% confidence intervals in brackets.

### Meta analysis

| Trait                                                         | Beta IVW              | P IVW      | Beta Egger            | P Egger | Beta WM               | P WM    | Beta PWM               | P PWM   |
|---------------------------------------------------------------|-----------------------|------------|-----------------------|---------|-----------------------|---------|------------------------|---------|
| TRIGLYCERIDES adjusted by LDL CHOLESTEROL and HDL CHOLESTEROL | 0.094 (0.073, 0.115)  | < 1 x E-15 | 0.112 (0.081, 0.144)  | 1.3E-02 | 0.052 (0.033, 0.071)  | 1.1E-07 | 0.048 (0.029, 0.068)   | 1.1E-06 |
| HDL CHOLESTEROL adjusted by TRIGLYCERIDES and LDL CHOLESTEROL | 0.011 (-0.005, 0.028) | 1.7E-01    | 0.029 (0.006, 0.052)  | 1.3E-02 | 0.008 (-0.007, 0.024) | 3.0E-01 | -0.008 (-0.028, 0.012) | 4.3E-01 |
| LDL CHOLESTEROL adjusted by HDL CHOLESTEROL and TRIGLYCERIDES | 0.018 (0.001, 0.035)  | 3.4E-02    | 0.014 (-0.012, 0.040) | 3.0E-01 | 0.029 (0.014, 0.045)  | 1.8E-04 | 0.032 (0.016, 0.048)   | 9.6E-05 |

### UK Biobank

| Trait                                                         | Beta IVW              | P IVW   | Beta Egger            | P Egger | Beta WM               | P WM    | Beta PWM                | P PWM   |
|---------------------------------------------------------------|-----------------------|---------|-----------------------|---------|-----------------------|---------|-------------------------|---------|
| TRIGLYCERIDES adjusted by LDL CHOLESTEROL and HDL CHOLESTEROL | 0.069 (0.040, 0.098)  | 2.1E-05 | 0.092 (0.049, 0.134)  | 1.1E-04 | 0.048 (0.027, 0.070)  | 1.0E-05 | 0.044 (0.022, 0.066)    | 8.5E-05 |
| HDL CHOLESTEROL adjusted by TRIGLYCERIDES and LDL CHOLESTEROL | 0.003 (-0.018, 0.024) | 7.6E-01 | 0.017 (-0.014, 0.048) | 2.8E-01 | 0.002 (-0.016, 0.019) | 8.6E-01 | -0.035 (-0.060, -0.009) | 8.6E-03 |
| LDL CHOLESTEROL adjusted by HDL CHOLESTEROL and TRIGLYCERIDES | 0.015 (-0.004, 0.034) | 1.2E-01 | 0.026 (-0.004, 0.055) | 9.1E-02 | 0.032 (0.016, 0.048)  | 1.1E-04 | 0.033 (0.016, 0.050)    | 1.5E-04 |

### CKDGen

| Trait                     | Beta IVW             | P IVW   | Beta Egger           | P Egger | Beta WM              | P WM    | Beta PWM             | P PWM   |
|---------------------------|----------------------|---------|----------------------|---------|----------------------|---------|----------------------|---------|
| TRIGLYCERIDES adjusted by | 0.123 (0.092, 0.154) | 4.6E-10 | 0.136 (0.091, 0.181) | 3.6E-07 | 0.064 (0.023, 0.106) | 2.5E-03 | 0.064 (0.022, 0.106) | 2.8E-03 |

## SUPPLEMENTARY DATA

LDL CHOLESTEROL and HDL  
CHOLESTEROL

HDL CHOLESTEROL adjusted  
by TRIGLYCERIDES and LDL  
CHOLESTEROL

|                       |         |                      |         |                       |         |                      |         |
|-----------------------|---------|----------------------|---------|-----------------------|---------|----------------------|---------|
| 0.024 (-0.002, 0.049) | 7.8E-02 | 0.044 (0.010, 0.079) | 1.4E-02 | 0.031 (-0.002, 0.063) | 6.4E-02 | 0.031 (0.000, 0.062) | 5.4E-02 |
|-----------------------|---------|----------------------|---------|-----------------------|---------|----------------------|---------|

LDL CHOLESTEROL adjusted  
by HDL CHOLESTEROL and  
TRIGLYCERIDES

|                       |         |                        |         |                       |         |                       |         |
|-----------------------|---------|------------------------|---------|-----------------------|---------|-----------------------|---------|
| 0.028 (-0.007, 0.064) | 1.2E-01 | -0.031 (-0.012, 0.040) | 3.0E-01 | 0.029 (-0.047, 0.056) | 8.6E-01 | 0.026 (-0.027, 0.080) | 3.4E-01 |
|-----------------------|---------|------------------------|---------|-----------------------|---------|-----------------------|---------|

---

IVW = inverse variance weighted instrumental variable analysis, WM = weighted median analysis, PWM = penalised weighted median analysis.

SUPPLEMENTARY DATA

Supplementary Table 4. UK Biobank and CKDGen grs and two sample Mendelian randomization results between investigated traits and ACR.

| UK Biobank                        |          |        |         |          |        |          |            |          |         |             |         |        |         |          |        |          |
|-----------------------------------|----------|--------|---------|----------|--------|----------|------------|----------|---------|-------------|---------|--------|---------|----------|--------|----------|
| Trait                             | Beta grs | SE grs | P grs   | Beta IVW | SE IVW | P IVW    | Beta Egger | SE Egger | P Egger | Egger int p | Beta WM | SE WM  | P WM    | Beta PWM | SE PWM | P PWM    |
| Diastolic BP                      | 0.0839   | 0.0105 | 1.4E-15 | 0.0075   | 0.0018 | 7.6E-05  | 0.0011     | 0.0051   | 8.3E-01 | 1.83E-01    | 0.0080  | 0.0016 | 1.0E-06 | 0.0057   | 0.0021 | 5.9E-03  |
| Systolic BP                       | 0.0835   | 0.0115 | 4.7E-13 | 0.0035   | 0.0012 | 5.1E-03  | 0.0035     | 0.0038   | 3.6E-01 | 9.98E-01    | 0.0046  | 0.0010 | 6.2E-06 | 0.0037   | 0.0014 | 6.5E-03  |
| HDL cholesterol                   | -0.0198  | 0.0065 | 2.4E-03 | -0.0133  | 0.0122 | 2.8E-01  | -0.0041    | 0.0179   | 8.2E-01 | 4.84E-01    | 0.0087  | 0.0091 | 3.4E-01 | -0.0058  | 0.0171 | 7.4E-01  |
| LDL cholesterol                   | 0.0204   | 0.0059 | 4.9E-04 | 0.0271   | 0.0157 | 1.3E-02  | 0.0361     | 0.0160   | 2.8E-02 | 4.53E-01    | 0.0334  | 0.0088 | 1.4E-04 | 0.0270   | 0.0099 | 6.5E-03  |
| Triglycerides                     | 0.0568   | 0.0070 | 3.6E-16 | 0.0548   | 0.0149 | 6.1E-04  | 0.0581     | 0.0220   | 1.1E-02 | 8.37E-01    | 0.0460  | 0.0116 | 7.0E-05 | 0.0460   | 0.0188 | 1.5E-02  |
| BMI                               | 0.0260   | 0.0126 | 3.9E-02 | 0.0068   | 0.0149 | 6.5E-01  | 0.0916     | 0.0313   | 4.2E-03 | 2.76E-03    | 0.0093  | 0.0161 | 7.8E-01 | 0.0286   | 0.0194 | 1.4E-01  |
| % Body fat                        | -0.0758  | 0.0440 | 8.5E-02 | -0.0661  | 0.0652 | 7.2E-01  | 0.2180     | 0.1532   | 9.0E-01 | 7.31E-02    | -0.1170 | 0.0477 | 5.7E-01 | -0.0753  | 0.0744 | 7.7E-01  |
| Waist hip ratio (adjusted by BMI) | 0.0391   | 0.0077 | 3.7E-07 | 0.0357   | 0.0106 | 8.8E-04  | 0.0936     | 0.0255   | 2.7E-04 | 1.28E-02    | 0.0503  | 0.0122 | 3.6E-05 | 0.0321   | 0.0127 | 1.1E-02  |
| Fasting glucose                   | -0.0005  | 0.0004 | 1.7E-01 | -0.0038  | 0.0370 | 9.2E-01  | -0.0074    | 0.0727   | 9.2E-01 | 9.54E-01    | -0.0143 | 0.0253 | 5.7E-01 | -0.0125  | 0.0274 | 6.5E-01  |
| Fasting insulin                   | 0.0000   | 0.0006 | 9.9E-01 | -0.0810  | 0.1364 | 5.7E-01  | -0.8563    | 0.7542   | 2.9E-01 | 3.21E-01    | -0.0415 | 0.0725 | 5.7E-01 | -0.0394  | 0.0844 | 6.4E-01  |
| T2D                               | 0.0010   | 0.0003 | 6.4E-04 | 0.0176   | 0.0041 | 5.53E-05 | 0.0232     | 0.0082   | 6.5E-03 | 4.4E-01     | 0.0233  | 0.0051 | 5.2E-06 | 0.0260   | 0.0063 | 3.28E-05 |

Grs= genetic risk score, IVW = inverse variance weighted instrumental variable analysis, WM = weighted median analysis, PWM = penalised weighted median analysis, Egger int p = Egger p for intercept.

## SUPPLEMENTARY DATA

### CKDGen

| Trait                             | Beta grs      | SE grs        | P grs         | Beta IVW | SE IVW | P IVW   | Beta Egger | SE Egger | P Egger | Egger int p | Beta WM | SE WM  | P WM    | Beta PWM | SE PWM | P PWM   |
|-----------------------------------|---------------|---------------|---------------|----------|--------|---------|------------|----------|---------|-------------|---------|--------|---------|----------|--------|---------|
| Diastolic BP                      | Not available | Not available | Not available | 0.0136   | 0.0029 | 1.3E-05 | -0.0062    | 0.0082   | 4.5E-01 | 1.1E-02     | 0.0143  | 0.0035 | 4.0E-05 | 0.0143   | 0.0035 | 5.6E-05 |
| Systolic BP                       | Not available | Not available | Not available | 0.0104   | 0.0019 | 3.7E-07 | -0.0043    | 0.0055   | 4.3E-01 | 5.5E-03     | 0.0097  | 0.0022 | 1.1E-05 | 0.0098   | 0.0021 | 4.4E-06 |
| HDL cholesterol                   | Not available | Not available | Not available | -0.0098  | 0.0131 | 4.6E-01 | 0.0269     | 0.0175   | 1.3E-01 | 3.0E-03     | 0.0307  | 0.0161 | 5.7E-02 | 0.0307   | 0.0161 | 5.7E-02 |
| LDL cholesterol                   | Not available | Not available | Beta grs      | SE grs   | P grs  | 2.4E-01 | -0.0262    | 0.0292   | 3.7E-01 | 4.3E-02     | 0.0029  | 0.0265 | 9.1E-01 | 0.0253   | 0.0259 | 3.3E-01 |
| Triglycerides                     | Not available | Not available | Not available | 0.0697   | 0.0159 | 6.0E-05 | 0.0713     | 0.0231   | 3.4E-03 | 9.3E-01     | 0.0641  | 0.0212 | 2.5E-03 | 0.0641   | 0.0214 | 2.7E-03 |
| BMI                               | Not available | Not available | Not available | 0.0885   | 0.0292 | 3.4E-03 | 0.0662     | 0.0717   | 3.6E-01 | 3.9E-03     | 0.0559  | 0.0434 | 2.0E-01 | 0.0562   | 0.0434 | 2.0E-01 |
| % Body fat                        | Not available | Not available | Not available | -0.2947  | 0.0804 | 2.9E-03 | -0.2399    | 0.2355   | 3.3E-01 | 8.0E-01     | -0.3053 | 0.1197 | 1.1E-02 | -0.3053  | 0.1147 | 7.8E-03 |
| Waist hip ratio (adjusted by BMI) | Not available | Not available | Not available | 0.0651   | 0.0271 | 1.7E-02 | 0.1478     | 0.0805   | 6.8E-02 | 2.8E-01     | 0.0435  | 0.0398 | 2.7E-01 | 0.0305   | 0.0407 | 4.5E-01 |
| Fasting glucose                   | Not available | Not available | Not available | -0.0337  | 0.0499 | 5.1E-01 | -0.0921    | 0.0940   | 3.4E-01 | 4.7E-01     | -0.0321 | 0.0560 | 5.7E-01 | -0.0321  | 0.0551 | 5.6E-01 |
| Fasting insulin                   | Not available | Not available | Not available | 0.0561   | 0.1483 | 7.1E-01 | -1.8712    | 0.8257   | 4.3E-02 | 2.9E-02     | -0.0150 | 0.1282 | 9.1E-01 | -0.0150  | 0.1287 | 9.1E-01 |
| T2D                               | Not available | Not available | Not available | -0.0133  | 0.0100 | 1.9E-01 | 0.0022     | 0.0216   | 9.2E-01 | 4.2E-01     | -0.0009 | 0.0164 | 9.5E-01 | -0.0009  | 0.0164 | 9.5E-01 |

Grs= genetic risk score, IVW = inverse variance weighted instrumental variable analysis, WM = weighted median analysis, PWM = penalised weighted median analysis, Egger int p = Egger p for intercept.

## SUPPLEMENTARY DATA

Supplementary Figure 1. Standard deviation differences in ACR per standard deviation differences in genetically instrumented lipids measures

No evidence of heterogeneity was noted between the MR estimates for the two different studies for HDL ( $p = 0.844$ , I-square 0.0%), LDL ( $p = 0.788$ , I-square 0.0%) and triglycerides ( $p = 0.494$ , I-squared 0.0%)

SUPPLEMENTARY DATA

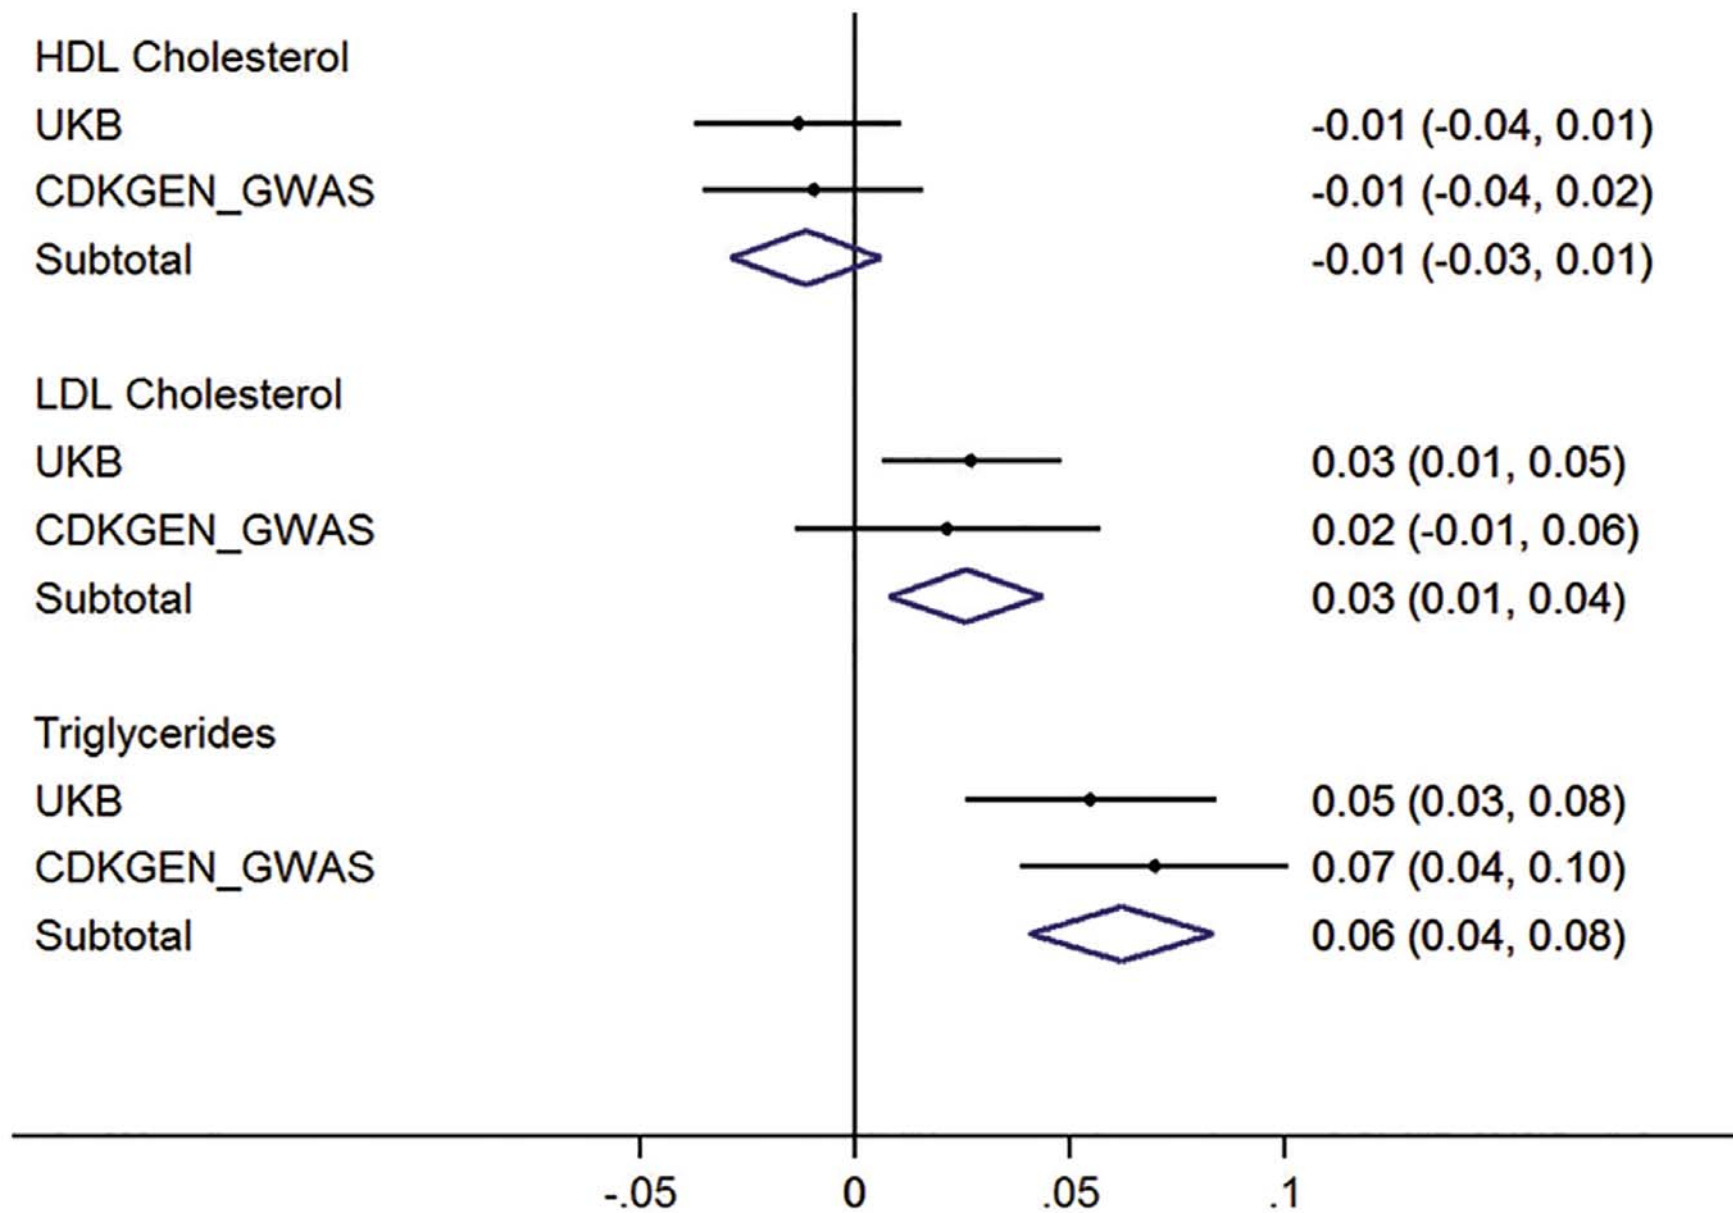

Supplement: EMS127219-supplement-Supplementary_Information.pdf [file EMS127219-supplement-Supplementary_Information.pdf]
